# Supplementary material for: Heritability enrichment in context-specific regulatory networks improves phenotype-relevant tissue identification
Source: eLife. 2022 Dec 16;11:e82535. doi: 10.7554/eLife.82535 (PMC9810332; doi:10.7554/eLife.82535)
Supplement: Supplementary file 1. — (a) Data source, transcription factor (TF) number, target gene (TG) number, regulatory element (RE) number, RE number per TG, and group information of paired RNA-seq and ATAC-seq for 77 regulatory networks. (b) SpecVar-based heritability enrichment, and its standard error, p-value, and q-value. (c) R scores of six phenotypes in 77 human contexts. (d) 206 phenotypes selected from UKBB and their top relevant contexts. (e) Relevance correlation and the top three common relevant tcontexts of UKBB phenotypes. (f) Number of regions of five genome partition methods (Spec, ARE, SAP, AAP, SEG). ARE, all regulatory elements; AAP, all accessible peaks; SAP, specifically accessible peaks; SEG, specifically expressed gene. [file elife-82535-supp1.xlsx]

## Sheet: Supplementary file 1a
Supplementary file 1a: Data source, TF number, TG number, RE number, RE number per TG, and group information of paired RNA-seq and ATAC-seq for 77 regulatory networks.
ID	Tissue	Tissue detail	Expression ID	Accessibility ID	TF	TG	RE	REs_TG_Mean	REs_TG_Median	Group
1	adrenal gland	adrenal gland	ENCFF254VJQ,ENCFF250FNI,ENCFF587WDK,ENCFF036ERC	ENCFF970LXV,ENCFF374OSU,ENCFF279GVQ,ENCFF430AHU	447	2865	21620	7.59337	9	1
2	Ammons horn	Ammon's horn	Median expression from GTEx	ENCSR584LUZ	393	2817	21317	8.22613	9	2
3	BE2C	BE2C	ENCSR000BYK	ENCFF001CNX	484	4372	23514	7.96683	9	3
4	BJ	BJ	ENCSR000COP	ENCFF001COH	490	2543	16560	7.39717	8	4
5	body of pancreas	body of pancreas	ENCFF204BZU,ENCFF368OME	ENCFF011ZXN,ENCFF646IYT	496	3006	7970	5.79474	6	5
6	breast epithelium	breast epithelium	ENCFF557XAK,ENCFF912TDO	ENCFF589ACB,ENCFF585YAB	454	3324	15412	7.10168	8	6
7	caudate nucleus	caudate nucleus	Median expression from GTEx	ENCSR015BGH	392	2702	18818	8.26462	9	2
8	CD4 Primary Cells	CD4 Primary Cells	GSM1059487,GSM1060238	GSM665839,GSM701539	447	3789	22075	6.97255	8	7
9	CD8 Primary Cells	CD8 Primary Cells	GSM1060237,GSM1060239	GSM665838,GSM701540	437	3581	19760	6.86065	8	7
10	CNCC	Cranial neural crest cells	GSM1817212,GSM1817213,GSM1817214,GSM1817215,GSM1817216,GSM1817217	GSM1817203,GSM1817204,GSM1817205,GSM1817206,GSM1817207	348	3441	22366	8.03575	9	8
11	cerebellum	cerebellum	Median expression from GTEx	ENCSR000EIJ	451	7271	15687	6.35552	6	2
12	esophagus muscularis mucosa	esophagus muscularis mucosa	ENCFF660MOE,ENCFF650KLZ	ENCFF208ILP,ENCFF762MNF	440	3075	20125	7.61886	9	6
13	esophagus squamous epithelium	esophagus squamous epithelium	ENCFF560ZBX,ENCFF301YAH	ENCFF846JID,ENCFF542ZZY	431	4971	31292	7.49065	8	9
14	Fetal Adrenal Gland	Fetal Adrenal Gland	GSM1220584,GSM1059505,GSM1059525,GSM1060240,GSM1060241	GSM530653,GSM817165,GSM817167,GSM1027310,GSM1027311	497	2844	20661	7.66702	9	1
15	Fetal Heart	Fetal Heart	GSM1059495,GSM1059494	GSM817220,GSM878630	439	2600	19328	8.17192	9	10
16	Fetal Intestine Large	Fetal Intestine Large	GSM1059485,GSM1059509,GSM1059516,GSM1059518,GSM1059520	GSM701495,GSM701531,GSM774213,GSM774220,GSM774228	461	2617	20617	8.13145	9	12
17	Fetal Intestine Small	Fetal Intestine Small	GSM1059486,GSM1059508	GSM701496,GSM701530	450	2908	21816	8.07118	9	12
18	Fetal Kidney	Fetal Kidney	GSM1059512,GSM1059510,GSM1059526,GSM1059523	GSM701515,GSM817159,GSM817181,GSM774221	440	2746	19847	8.53023	10	14
19	Fetal Lung	Fetal Lung, Left	GSM1101684,GSM1101685,GSM1101687,GSM1101683,GSM1101691,GSM1101692,GSM1101693,GSM1101699,GSM1101708,GSM1101707,GSM1101709	GSM701524,GSM701527,GSM701534,GSM701523,GSM774227,GSM774231,GSM817168,GSM817175,GSM817185,GSM817174,GSM817186	452	2737	21540	8.58531	10	13
20	Fetal Muscle	Fetal Muscle, Arm	GSM1101689,GSM1101690,GSM1101688,GSM1101686,GSM1101694,GSM1101695,GSM1101682,GSM1220596,GSM1101696,GSM1101698,GSM1101697,GSM1101701,GSM1101710,GSM1101674,GSM1101675,GSM1101703,GSM1101704,GSM1101661,GSM1101663,GSM1101677,GSM1101705,GSM1101706,GSM1101664,GSM1101671,GSM1101676,GSM1101700,GSM1101673,GSM1101678,GSM1101670,GSM1101672,GSM1220579,GSM1220582	GSM701535,GSM701536,GSM701533,GSM701522,GSM774226,GSM774234,GSM774239,GSM774224,GSM774235,GSM774242,GSM774238,GSM817178,GSM817191,GSM817214,GSM817216,GSM817171,GSM817182,GSM817200,GSM817207,GSM817217,GSM817179,GSM817183,GSM817206,GSM817213,GSM817212,GSM878610,GSM878625,GSM878632,GSM878626,GSM878631,GSM878653,GSM878654	573	2324	19368	8.15404	9	11
21	Fetal Ovary	Fetal Ovary	GSM1101662	GSM1027306	494	2768	13627	7.35549	8	16
22	Fetal Renal Cortex	Fetal Renal Cortex	GSM1059496,GSM1059515,GSM1059498,GSM1059528,GSM1059489,GSM1059492,GSM1059488,GSM1059499,GSM1059497	GSM701529,GSM701532,GSM701517,GSM817190,GSM817203,GSM817211,GSM817202,GSM817210,GSM878629	443	2504	19668	8.55551	10	14
23	Fetal Renal Pelvis	Fetal Renal Pelvis, Left	GSM1059514,GSM1059500,GSM1059524,GSM1059491,GSM1059504,GSM1059503,GSM1059490,GSM1059502,GSM1059501	GSM701520,GSM701518,GSM774222,GSM817193,GSM817205,GSM817209,GSM817192,GSM817204,GSM817208	444	2748	20961	8.54148	10	14
24	Fetal Spinal Cord	Fetal Spinal Cord	GSM1101711,GSM1220580,GSM1101679	GSM817189,GSM878661,GSM1027308	471	3421	26210	8.71412	10	17
25	Fetal Spleen	Fetal Spleen	GSM1220588	GSM701509	398	3201	19476	8.11965	9	15
26	Fetal Stomach	Fetal Stomach	GSM1220587,GSM1220583,GSM1220594	GSM701521,GSM701538,GSM701538	466	3118	24511	8.09814	9	18
27	Fetal Thymus	Fetal Thymus	GSM1220591,GSM1220593,GSM1220593,GSM1220599,GSM1220578	GSM701497,GSM701537,GSM774230,GSM817172,GSM878657	442	3502	23293	7.91091	9	19
28	Fibroblasts	Fibroblasts, Fetal Skin, Abdomen	GSM1101681,GSM1101666,GSM1101667,GSM1101668	GSM878635,GSM878623,GSM878634,GSM878633	531	2180	16733	7.76743	9	4
29	Foreskin Fibroblast Primary Cells skin02	Foreskin Fibroblast Primary Cells skin02	GSM941744,GSM941744	GSM817169,GSM817170	461	2853	20017	7.90676	9	4
30	Foreskin Keratinocyte Primary Cells skin02	Foreskin Keratinocyte Primary Cells skin02	GSM941745,GSM941745	GSM817196,GSM817197	511	3199	18895	7.83182	9	20
31	frontal cortex	frontal cortex	Median expression from GTEx,Median expression from GTEx	ENCSR000EIY,ENCSR000EIK	350	3096	23154	8.18572	9	2
32	Gastric	Gastric	GSM1010960,GSM1120306	GSM1027325,GSM1027320	498	2893	18890	7.62254	9	5
33	gastrocnemius medialis	gastrocnemius medialis	ENCFF342MON,ENCFF728KWY,ENCFF092VEZ,ENCFF151LCI,ENCFF149OTO	ENCFF508WVY,ENCFF086TID,ENCFF461GFF,ENCFF858PLS,ENCFF478ARL	505	2386	15621	8.04191	9	21
34	gastroesophageal sphincter	gastroesophageal sphincter	ENCFF338HIM,ENCFF749AJA	ENCFF293BRN,ENCFF765DRX	455	2438	14178	8.06973	9	6
35	GM12878	GM12878	ENCSR000AEE	ENCFF000SKV	425	3281	14729	7.31576	8	22
36	H1 BMP4 Derived Trophoblast Cultured Cells	H1 BMP4 Derived Trophoblast Cultured Cells	ENCSR762CJN	ENCFF983HYM	452	3353	23332	8.17507	9	23
37	H1-hESC	H1-hESC	ENCSR000COU	ENCFF876IHU	409	3845	19828	7.5394	9	24
38	H7-hESC	H7-hESC	ENCSR490SQH	ENCFF000SOL	449	3531	19596	7.2665	8	24
39	heart left ventricle	heart left ventricle	ENCFF470AAE,ENCFF870BQB	ENCFF702IJE,ENCFF906UQF	436	2597	11703	7.59107	8	25
40	HeLa-S3	HeLa-S3	ENCSR552EGO	ENCFF000SPR	437	3349	17067	7.6593	9	26
41	Hematopoietic multipotent progenitor cell	Hematopoietic multipotent progenitor cell	ENCSR000CUA	ENCSR115YPI	411	3143	19199	7.24276	8	19
42	HepG2	HepG2	ENCSR931WGT	ENCFF000SQJ	408	4443	17818	6.98132	8	27
43	Jurkat	Jurkat	ENCSR000BXX	ENCFF001DOT	466	2851	13999	7.43985	8	22
44	K562	K562	ENCSR000CPH	ENCFF000SWS	483	3246	19621	7.74892	9	26
45	lower leg skin	lower leg skin	ENCFF153NMV	ENCFF238BRB	459	4267	31150	7.65057	9	9
46	MCF-7	MCF-7	ENCSR000CPT	ENCFF000SYX	461	3187	17679	7.44901	8	26
47	Melanocyte	Melanocyte	GSM941743,GSM941743	GSM1027307,GSM1027312	487	4417	23668	7.62735	8	28
48	omental fat pad	omental fat pad	ENCFF324LPM,ENCFF766ECG	ENCFF519QGD,ENCFF880CAD	442	3802	24900	7.25329	8	6
49	Ovary	Ovary	GSM1010948	GSM1027334	444	3763	19847	7.39968	8	16
50	ovary	ovary	ENCFF232UER,ENCFF957VSL	ENCFF420ECZ,ENCFF247HQX	500	2486	15645	7.64481	8	6
51	Panc1	Panc1	ENCSR000BYM	ENCFF001EDO	501	2848	13415	7.66117	9	20
52	Pancreas	Pancreas	GSM1010966,GSM1120309	GSM1027326,GSM1027335	515	3178	18525	7.13027	8	5
53	Peyers patch	Peyer's patch	ENCFF336EQS,ENCFF187NLN,ENCFF715EVL	ENCFF748WZP,ENCFF474HAC,ENCFF603CAV	419	3783	33130	8.08432	9	29
54	Primary B cells from peripheral blood	Primary B cells from peripheral blood	GSM1220576	GSM701507	451	3141	14001	7.22509	8	19
55	Primary hematopoietic stem cells G-CSF-mobilized Female	Primary hematopoietic stem cells G-CSF-mobilized Female	GSM909310	GSM530657	400	3094	20865	7.39722	8	19
56	Primary monocytes from peripheral blood	Primary monocytes from peripheral blood	GSM1220575	GSM701541	400	3854	17361	6.58926	7	30
57	Primary Natural Killer cells from peripheral blood	Primary Natural Killer cells from peripheral blood	GSM1220577	GSM701508	390	3228	13943	7.21375	8	7
58	Primary T cells from cord blood	Primary T cells from cord blood	GSM1220574	GSM701516	426	3858	16877	7.38362	8	7
59	prostate gland	prostate gland	ENCFF454GAP,ENCFF110THT	ENCFF007NTA,ENCFF670GFY	490	3249	23661	7.25854	8	9
60	Psoas Muscle	Psoas Muscle	GSM1120310	GSM1027321	477	2860	19759	7.51678	8	31
61	putamen	putamen	Median expression from GTEx	ENCSR493VDS	386	2615	17063	8.10669	9	2
62	right atrium auricular region	right atrium auricular region	ENCFF406YAV,ENCFF701KTC	ENCFF513LVE,ENCFF939RTU	413	2636	17171	7.73065	9	25
63	right lobe of liver	right lobe of liver	ENCFF347TXW	ENCFF244IRQ	426	3477	10114	5.72936	6	32
64	sigmoid colon	sigmoid colon	ENCFF934VJV,ENCFF192TOO,ENCFF179AVF,ENCFF146ISW	ENCFF482HAC,ENCFF387OFS,ENCFF692DLP,ENCFF754DCA	471	2620	15354	7.42863	9	6
65	spleen	spleen	ENCFF087VIO,ENCFF916TWO	ENCFF294ZCT,ENCFF183HFJ	411	4475	35677	8.02011	9	33
66	stomach	stomach	ENCFF155AGD,ENCFF930JZC,ENCFF535HFG	ENCFF025QEQ,ENCFF184XKI,ENCFF758MDE	462	3807	26513	7.78198	9	34
67	subcutaneous adipose tissue	subcutaneous adipose tissue	ENCFF967YNU	ENCFF159RKV	448	2786	13970	7.50287	8	6
68	T47D	T47D	ENCSR000BYF	ENCFF000TET	454	4037	24943	7.86079	9	26
69	testis	testis	ENCFF673KOG,ENCFF438ZIY	ENCFF048IOT,ENCFF066TTB	485	4750	34343	7.04526	8	35
70	thoracic aorta	thoracic aorta	ENCFF127YOW	ENCFF984OPE	426	3414	10791	6.03749	6	6
71	thyroid gland	thyroid gland	ENCFF625QLJ,ENCFF376HXE,ENCFF194VCC,ENCFF509HKT	ENCFF942YPH,ENCFF743DWF,ENCFF611LJR,ENCFF530YPZ	479	5538	32002	6.8783	7	36
72	tibial nerve	tibial nerve	ENCFF904FEZ,ENCFF241VXT	ENCFF226ZCG,ENCFF372VAD	444	3291	16526	7.34701	8	6
73	transverse colon	transverse colon	ENCFF874CRV,ENCFF505DGK,ENCFF332OML,ENCFF014IOZ	ENCFF629OKO,ENCFF159DOO,ENCFF746GDH,ENCFF715LGJ	446	3788	22233	7.48601	9	34
74	Treg Primary Cells	Treg Primary Cells	GSM1059522,GSM1059507,GSM1220590,GSM1220597,GSM1059493,GSM1220598,GSM1220600,GSM1220581	GSM774233,GSM774216,GSM774212,GSM774232,GSM817218,GSM817173,GSM817199,GSM878659	506	3383	24695	7.89979	9	18
75	upper lobe of left lung	upper lobe of left lung	ENCFF049ETK,ENCFF841RGX,ENCFF360GZR	ENCFF022PJN,ENCFF985OXZ,ENCFF803ZER	427	4229	34733	7.66848	9	36
76	uterus	uterus	ENCFF624VKT	ENCFF678QTC	470	3670	24656	7.7545	9	6
77	vagina	vagina	ENCFF855LJY	ENCFF243NYB	441	4446	33692	7.39699	8	9
Note: IDs begin with ENC are from ENCODE and IDs begin with GSM are from GEO.

## Sheet: Supplementary file 1b
Supplementary file 1b. SpecVar-based heritability enrichment, and its standard error, p value and q value.
Tissue	LDL_Enrichment	LDL_Enrichment_std_err	LDL_Enrichment_p	LDL_Enrichment_q	TC_Enrichment	TC_Enrichment_std_err	TC_Enrichment_p	TC_Enrichment_q	EA_Enrichment	EA_Enrichment_std_err	EA_Enrichment_p	EA_Enrichment_q	CP_Enrichment	CP_Enrichment_std_err	CP_Enrichment_p	CP_Enrichment_q	BrainShape_Enrichment	BrainShape_Enrichment_std_err	BrainShape_Enrichment_p	Enrichment_q	Face_Enrichment	Face_Enrichment_std_err	Face_Enrichment_p	Enrichment_q
adrenal_gland	-24.1691	31.4629	0.424975	0.740944	-32.7988	34.341	0.330359	0.752081	44.0693	21.336	0.0449669	0.270263	13.3523	22.3349	0.580554	0.859667	-12.4272	17.7408	0.451996	0.785915	-25.636	34.1723	0.429153	0.918673
Ammons_horn	-37.3146	89.8459	0.661689	0.818053	-38.5091	76.5428	0.59818	0.802689	74.9194	38.983	0.0595682	0.285376	77.5511	37.6207	0.0414079	0.531401	-43.7809	40.1363	0.26546	0.664549	-157.853	82.2017	0.0471763	0.610461
BE2C	-9.54883	16.1453	0.51937	0.740944	-20.6449	14.2661	0.141527	0.54488	7.70578	8.37867	0.425053	0.80951	9.32375	8.47828	0.32746	0.785175	-2.4213	13.056	0.793115	0.914064	-0.268871	32.7393	0.969054	0.985867
BJ	-43.3697	45.8215	0.340953	0.740944	276.27	332.678	0.405876	0.752081	-15.2901	22.0992	0.462577	0.80951	-23.0534	23.0146	0.294347	0.755491	-40.8432	34.7811	0.231358	0.614294	94.4732	100.826	0.351008	0.918673
body_of_pancrea	223.315	181.691	0.210097	0.740944	29.783	96.1688	0.763781	0.86968	-48.5584	12.7494	0.000164446	0.0126623	-50.3265	27.3138	0.0612096	0.576212	59.4887	133.946	0.661757	0.879401	-36.1283	187.664	0.844137	0.985867
breast_epithelium	-26.7166	33.5321	0.401732	0.740944	-44.552	29.2619	0.123317	0.54488	-22.8051	14.1207	0.0916312	0.35278	-14.2126	12.5575	0.226562	0.755491	-50.4982	25.3812	0.0433003	0.333484	-75.3557	79.0358	0.3295	0.918673
caudate_nucleus	-14.9171	40.9479	0.693725	0.828607	-6.71909	32.7948	0.813208	0.86968	27.4384	22.2054	0.235736	0.672284	17.9971	19.2915	0.377292	0.785175	-9.42354	26.6704	0.694559	0.879401	22.2042	55.5697	0.703396	0.985867
CD4_Primary_Cells	67.1793	85.1045	0.429666	0.740944	53.7796	72.3043	0.459062	0.752081	-9.86791	11.9149	0.35984	0.748857	4.84246	17.684	0.827668	0.885145	10.026	41.0986	0.826227	0.914064	97.5975	122.494	0.430213	0.918673
CD8_Primary_Cells	27.2309	32.584	0.42687	0.740944	10.17	34.5768	0.788234	0.86968	7.44484	8.4252	0.444544	0.80951	-15.6325	8.68787	0.0564007	0.576212	1.35368	22.1895	0.987258	0.987258	5.49858	45.6552	0.921574	0.985867
cerebellum	92.9216	47.7664	0.0652511	0.55826	63.5978	33.136	0.0658395	0.42247	31.4917	14.488	0.0364656	0.270263	20.9826	9.46948	0.036562	0.531401	28.8277	16.2413	0.084141	0.432009	6.6408	31.7187	0.858274	0.985867
CNCC	-26.3243	28.1816	0.310253	0.740944	-33.6995	22.3368	0.105244	0.540253	-4.5365	11.6522	0.634813	0.917656	15.9338	13.1577	0.259194	0.755491	148.845	41.8205	0.000360085	0.0277266	100.639	50.6435	0.0456091	0.610461
esophagus_muscularis_mucosa	77.2423	74.6227	0.307279	0.740944	50.8915	70.7076	0.474204	0.754091	-17.2746	10.2066	0.0762274	0.308921	-4.20689	15.6527	0.739575	0.865081	39.8324	29.9761	0.195551	0.614294	-48.3139	81.3526	0.546842	0.977908
esophagus_squamous_epithelium	50.2896	48.6765	0.295752	0.740944	92.1248	82.6479	0.261976	0.720433	-17.055	7.29742	0.0137432	0.151175	-9.71835	10.0768	0.292337	0.755491	0.456068	15.5325	0.972088	0.984879	30.6319	35.0425	0.393256	0.918673
Fetal_Adrenal_Gland	95.9405	49.5307	0.0515904	0.55826	245.83	162.794	0.131318	0.54488	4.22217	9.48827	0.734428	0.996355	-7.35753	7.24301	0.251992	0.755491	11.1073	16.027	0.526628	0.811008	4.61351	24.8587	0.884236	0.985867
Fetal_Heart	-42.5547	18.9644	0.0303777	0.431476	-41.6403	16.5093	0.0122617	0.236038	-6.05978	9.52297	0.461354	0.80951	-8.8905	12.5436	0.429577	0.814242	26.0821	31.1148	0.42235	0.780296	-18.9256	33.5739	0.54994	0.977908
Fetal_Intestine_Large	170.562	160.748	0.288476	0.740944	192.369	203.445	0.343754	0.752081	-15.6691	12.4186	0.180802	0.580073	-5.40847	12.5481	0.610055	0.865081	60.9251	34.9657	0.0841575	0.432009	56.8641	61.4527	0.360153	0.918673
Fetal_Intestine_Small	28.4376	34.2494	0.413861	0.740944	16.0105	24.3378	0.532528	0.759345	-0.0557412	6.8616	0.877685	0.996355	14.1697	11.9602	0.269528	0.755491	-15.2296	12.8329	0.208113	0.614294	-32.1567	40.6404	0.415131	0.918673
Fetal_Kidney	83.6861	71.0543	0.242672	0.740944	49.1744	61.6353	0.430288	0.752081	-20.7918	10.9829	0.0482997	0.270263	6.39565	18.0252	0.763968	0.865081	21.2529	35.6618	0.572145	0.815837	28.5706	50.1925	0.583454	0.977908
Fetal_Lung	11.1337	16.0274	0.51591	0.740944	-1.94576	17.0557	0.860503	0.871825	0.773127	5.63193	0.967902	0.996355	6.47802	9.04018	0.544543	0.825606	24.598	15.5157	0.126993	0.559607	1.44636	25.1976	0.985867	0.985867
Fetal_Muscle	22.8942	15.0299	0.126501	0.707326	9.67069	11.2949	0.428318	0.752081	-2.44598	3.48873	0.323953	0.733658	-3.15547	4.5246	0.360229	0.785175	19.8083	9.22111	0.0363675	0.333484	23.6984	16.5767	0.170509	0.918673
Fetal_Ovary	43.7596	82.6704	0.605215	0.784429	43.4969	66.0441	0.516431	0.759345	-8.18841	17.1763	0.592752	0.894939	-6.61903	21.5096	0.723391	0.865081	84.7551	80.4888	0.298137	0.664549	-6.91454	113.653	0.94441	0.985867
Fetal_Renal_Cortex	-17.4407	21.1792	0.387789	0.740944	-18.1118	22.215	0.390671	0.752081	-11.2905	9.66199	0.201728	0.597426	-16.1716	10.072	0.0880989	0.646923	37.4336	24.913	0.141346	0.572824	6.00499	53.935	0.926143	0.985867
Fetal_Renal_Pelvis	-68.6166	24.9384	0.00735531	0.232334	-3.70009	55.9178	0.931515	0.931515	-12.674	9.64009	0.157749	0.528116	9.59676	26.0019	0.741184	0.865081	-40.4739	22.8705	0.0710483	0.420824	-0.724749	74.2695	0.981571	0.985867
Fetal_Spinal_Cord	29.7404	38.2901	0.455558	0.740944	59.5729	50.8098	0.259131	0.720433	7.17633	6.2239	0.323448	0.733658	13.3238	6.75676	0.0673495	0.576212	27.6328	11.8473	0.0250943	0.325482	-47.4903	19.2829	0.0113001	0.435054
Fetal_Spleen	-0.712633	97.9258	0.985934	0.996487	31.2093	108.314	0.778378	0.86968	-12.7876	18.4495	0.455139	0.80951	44.9071	40.967	0.283559	0.755491	15.5766	37.3738	0.697819	0.879401	25.7656	77.7216	0.749585	0.985867
Fetal_Stomach	87.6162	85.3344	0.314676	0.740944	55.5518	67.6531	0.417601	0.752081	25.4222	25.9611	0.346288	0.740672	8.57284	19.7414	0.701443	0.865081	13.1133	40.5924	0.766141	0.907582	-2.62663	65.5511	0.955874	0.985867
Fetal_Thymus	41.0038	28.4777	0.154647	0.740944	46.64	26.6332	0.0783781	0.46424	1.08536	5.59049	0.987822	0.996355	-6.67877	5.79102	0.182761	0.755491	17.5831	13.5317	0.223672	0.614294	44.8649	21.7366	0.0475684	0.610461
Fibroblasts	-0.285402	31.4035	0.967057	0.992846	12.5911	31.743	0.711538	0.85607	-6.06026	12.1853	0.562991	0.894939	-20.085	13.8045	0.125987	0.727585	93.1493	70.4642	0.190143	0.614294	105.29	55.838	0.0597885	0.657674
Foreskin_Fibroblast_Primary_Cells_skin02	68.1631	88.5785	0.448515	0.740944	28.4357	60.6069	0.64906	0.83296	-2.53211	17.0882	0.836199	0.996355	-17.4175	16.2944	0.261218	0.755491	58.5385	41.0421	0.160953	0.588669	-20.3148	76.0639	0.778318	0.985867
Foreskin_Keratinocyte_Primary_Cells_skin02	21.6258	32.0928	0.515626	0.740944	28.1811	26.094	0.295514	0.752081	-2.29135	7.67189	0.667618	0.934666	-3.60459	10.6879	0.666087	0.865081	27.5865	13.1878	0.0413922	0.333484	-14.1965	28.3204	0.587505	0.977908
frontal_cortex	157.31	97.5412	0.117069	0.707326	86.9688	60.5815	0.156794	0.571821	61.271	19.1052	0.00186457	0.03665	64.615	17.8763	0.000444187	0.0342024	23.0559	23.0661	0.336573	0.68617	28.4613	33.459	0.406551	0.918673
Gastric	40.0477	51.9877	0.447734	0.740944	12.4492	47.6419	0.808607	0.86968	33.9665	43.387	0.4478	0.80951	-14.9062	16.9565	0.34829	0.785175	-35.1367	51.3309	0.480543	0.785915	-98.7483	77.6181	0.197231	0.918673
gastrocnemius_medialis	169.337	124.694	0.175374	0.740944	111.665	89.9465	0.21494	0.636554	0.966247	7.38409	0.996355	0.996355	5.58193	11.1094	0.679937	0.865081	6.627	15.0039	0.70809	0.879401	-7.17922	34.8991	0.815276	0.985867
gastroesophageal_sphincter	-17.7366	65.2023	0.771942	0.854204	12.8833	67.3405	0.858437	0.871825	3.38475	23.1692	0.918022	0.996355	-57.0564	23.6085	0.0134348	0.330243	283.38	342.005	0.409153	0.780296	132.677	155.287	0.395051	0.918673
GM12878	69.3951	102.937	0.500923	0.740944	84.1482	80.0025	0.301558	0.752081	-34.7706	16.9939	0.0388354	0.270263	0.715107	33.6197	0.993241	0.993241	-122.422	47.2893	0.00879382	0.225708	7.36033	108.273	0.953062	0.985867
H1_BMP4_Derived_Trophoblast_Cultured_Cells	67.4215	36.6464	0.0639893	0.55826	60.1749	31.0301	0.053609	0.42247	5.7076	8.37513	0.574478	0.894939	7.03019	10.0012	0.54683	0.825606	53.4101	16.8281	0.00199995	0.0769981	35.9126	37.0381	0.345308	0.918673
H1-hESC	61.5988	84.4442	0.466646	0.740944	83.1281	117.063	0.479876	0.754091	-0.595386	11.7089	0.891638	0.996355	-6.33746	18.7145	0.694728	0.865081	37.7134	35.6022	0.302888	0.664549	36.8666	70.2849	0.609605	0.977908
H7-hESC	156.441	130.062	0.231902	0.740944	192.291	152.583	0.209013	0.636554	-0.00770356	8.62579	0.906929	0.996355	2.96517	10.4668	0.851086	0.897721	21.5907	16.9691	0.226647	0.614294	30.7635	40.3411	0.452888	0.918673
heart_left_ventricle	-108.857	41.0598	0.0120313	0.232334	-136.262	34.7286	0.000256032	0.0197144	26.6761	25.7347	0.319866	0.733658	-12.0887	30.6591	0.669862	0.865081	-120.261	53.3479	0.0253622	0.325482	-160.754	120.447	0.181468	0.918673
HeLa-S3	7.63692	77.0613	0.930564	0.968289	-18.141	48.7969	0.693703	0.85607	-1.81229	16.5705	0.865446	0.996355	-18.1005	27.3369	0.48653	0.814242	50.8893	52.1782	0.338629	0.68617	57.5636	110.372	0.607082	0.977908
Hematopoietic_multipotent_progenitor_cell	-18.711	37.4445	0.601551	0.784429	-12.8523	34.3344	0.683554	0.85607	-2.12821	18.4014	0.865397	0.996355	10.2989	27.1241	0.731908	0.865081	-0.412571	37.468	0.969923	0.984879	-21.5029	79.8226	0.777174	0.985867
HepG2	16.1798	89.5242	0.864385	0.911748	71.4213	112.213	0.526945	0.759345	-36.787	14.2291	0.00850708	0.127181	-7.6113	27.9661	0.757495	0.865081	25.4354	42.0819	0.559367	0.815837	-134.909	82.8935	0.0939473	0.904242
Jurkat	32.62	113.691	0.777319	0.854204	15.6896	72.5641	0.837538	0.871493	17.6621	36.0008	0.643551	0.917656	32.0546	45.7234	0.497005	0.814242	-72.6206	32.4936	0.0228318	0.325482	-7.18588	100.288	0.935061	0.985867
K562	23.652	61.6422	0.710235	0.828607	-15.9735	46.9114	0.711474	0.85607	-15.0036	11.1076	0.150214	0.52575	26.6519	23.0941	0.267866	0.755491	37.291	26.5428	0.168191	0.588669	4.95768	47.6989	0.933862	0.985867
lower_leg_skin	61.5026	72.6747	0.393964	0.740944	23.3141	46.6033	0.624989	0.815663	-22.1037	8.86305	0.00991022	0.127181	-13.222	9.53259	0.136315	0.727585	-2.77165	21.6135	0.861164	0.922813	40.0124	45.6869	0.391582	0.918673
MCF-7	93.6745	105.066	0.375582	0.740944	61.0727	73.0951	0.407784	0.752081	3.9649	11.9258	0.803651	0.996355	-8.72524	18.724	0.603044	0.865081	-10.2598	25.9183	0.663026	0.879401	-8.37851	48.6844	0.846669	0.985867
Melanocyte	67.3818	40.3869	0.096291	0.674037	39.1717	28.2247	0.173824	0.581934	4.64925	7.7605	0.638491	0.917656	10.4162	8.61879	0.276622	0.755491	41.5328	26.6947	0.130817	0.559607	21.2374	28.7501	0.477194	0.926068
omental_fat_pad	57.9422	52.9141	0.282359	0.740944	60.6264	58.1083	0.308692	0.752081	-9.3678	10.4025	0.320128	0.733658	2.21231	15.7761	0.938827	0.970029	-32.8698	22.5563	0.130004	0.559607	16.4184	61.3664	0.802804	0.985867
ovary	-25.7145	41.7404	0.519623	0.740944	-67.0879	37.0995	0.0640048	0.42247	-12.4779	24.9469	0.589079	0.894939	-32.4533	28.4346	0.24201	0.755491	44.0514	46.6653	0.354926	0.700752	166.198	153.977	0.286388	0.918673
Ovary	40.3001	77.118	0.611243	0.784429	43.6998	75.2471	0.57353	0.788604	-3.76136	23.5702	0.839694	0.996355	2.39293	26.0208	0.957431	0.970029	17.2235	67.8814	0.811318	0.914064	35.2357	62.4416	0.583945	0.977908
Panc1	43.1188	72.2537	0.555461	0.763758	91.2709	100.259	0.363982	0.752081	-22.3517	7.46248	0.0019039	0.03665	-23.1453	9.98563	0.0161784	0.330243	-41.2987	21.5871	0.0476406	0.333484	-49.2049	45.8362	0.269463	0.918673
Pancreas	28.0308	52.2181	0.599476	0.784429	10.968	39.1798	0.797925	0.86968	1.30914	10.3508	0.976152	0.996355	-11.9427	13.6945	0.345067	0.785175	-14.3231	22.2358	0.491583	0.785915	17.1471	48.7373	0.740374	0.985867
Peyers_patch	31.6757	25.2022	0.211623	0.740944	59.5253	28.6549	0.0417537	0.42247	-7.06988	4.25207	0.0610228	0.285376	5.51414	5.86442	0.439828	0.814242	14.393	9.69417	0.159244	0.588669	-16.3615	19.2407	0.370848	0.918673
Primary_B_cells_from_peripheral_blood	10.637	42.8939	0.820711	0.877705	28.3343	35.5852	0.426859	0.752081	14.4194	23.3108	0.564976	0.894939	20.3492	25.145	0.441806	0.814242	-20.4443	28.2025	0.445414	0.785915	-46.9157	53.0331	0.367313	0.918673
Primary_hematopoietic_stem_cells_G-CSF-mobilized_Female	31.5925	29.7413	0.309398	0.740944	16.5891	30.7325	0.604623	0.802689	-6.97383	7.32858	0.277199	0.733658	-9.41322	14.7648	0.478866	0.814242	11.2979	17.9194	0.564128	0.815837	-23.5406	32.7965	0.453371	0.918673
Primary_monocytes_from_peripheral_blood	26.7281	27.636	0.345239	0.740944	54.4455	32.0005	0.0925562	0.509059	-6.77587	7.73733	0.31526	0.733658	4.46594	15.758	0.825943	0.885145	-7.87114	16.5997	0.593355	0.815863	-0.204541	37.5701	0.974426	0.985867
Primary_Natural_Killer_cells_from_peripheral_blood	93.1062	109.949	0.396682	0.740944	74.483	116.456	0.524704	0.759345	-3.89582	18.2201	0.788815	0.996355	-57.4181	24.6098	0.0171555	0.330243	3.50254	51.9637	0.961603	0.984879	-261.151	102.656	0.00880469	0.435054
Primary_T_cells_from_cord_blood	21.3432	64.8413	0.751256	0.850686	-38.0922	43.6583	0.371744	0.752081	2.17798	24.0178	0.960888	0.996355	28.5446	39.6599	0.486847	0.814242	-49.0411	70.1133	0.479681	0.785915	25.3099	101.338	0.8095	0.985867
prostate_gland	63.8863	52.4729	0.219734	0.740944	73.3171	53.3063	0.163377	0.571821	-13.5842	6.48938	0.025759	0.24793	-2.97633	12.7396	0.754534	0.865081	-9.81551	17.9943	0.547525	0.815837	40.9203	43.9476	0.363497	0.918673
Psoas_Muscle	27.2682	62.235	0.669316	0.818053	12.3717	54.4062	0.83247	0.871493	10.9425	16.3592	0.543096	0.894939	21.5987	29.1658	0.480878	0.814242	35.8329	33.0354	0.293618	0.664549	84.4432	73.3255	0.252168	0.918673
putamen	119.794	129.729	0.351866	0.740944	112.055	126.321	0.375695	0.752081	74.5874	56.9937	0.198419	0.597426	75.4605	78.7678	0.345239	0.785175	60.1875	30.3538	0.0468341	0.333484	-34.2668	86.9838	0.68292	0.985867
right_atrium_auricular_region	40.3185	58.5172	0.493816	0.740944	53.4588	71.5579	0.456913	0.752081	-1.42656	22.6008	0.9145	0.996355	-7.26305	18.3603	0.652321	0.865081	-8.30397	29.0856	0.749447	0.907582	-68.8773	75.4261	0.350561	0.918673
right_lobe_of_liver	678.913	392.433	0.086188	0.663647	537.356	270.033	0.0467594	0.42247	-2.01174	31.9155	0.924839	0.996355	26.1541	34.8819	0.472036	0.814242	19.9918	35.2069	0.589454	0.815863	-90.4377	109.128	0.394987	0.918673
sigmoid_colon	-72.134	27.9041	0.0120693	0.232334	-49.3354	25.4937	0.0581139	0.42247	-3.23406	18.6451	0.820752	0.996355	-18.4216	13.2304	0.1429	0.727585	-10.5096	29.7169	0.699282	0.879401	108.003	76.7494	0.164533	0.918673
spleen	-6.28962	27.9978	0.787643	0.854204	-10.8584	20.3655	0.554985	0.776979	2.39802	6.61464	0.832779	0.996355	6.08812	7.3104	0.486797	0.814242	-0.853973	11.775	0.874874	0.922813	20.0164	24.9756	0.447419	0.918673
stomach	22.1672	60.1973	0.72235	0.830163	75.1776	100.319	0.452822	0.752081	0.0662187	14.6424	0.949141	0.996355	32.7996	21.9967	0.151187	0.727585	-41.7036	22.8229	0.0608398	0.390389	4.93971	44.3943	0.929388	0.985867
subcutaneous_adipose_tissue	-89.7947	41.1141	0.0336215	0.431476	-99.2169	28.2608	0.00120032	0.0462122	-17.5052	20.8258	0.376643	0.763197	-42.6338	25.5636	0.0924175	0.646923	60.4221	84.2179	0.480594	0.785915	60.0425	176.956	0.738645	0.985867
T47D	70.6785	54.442	0.192072	0.740944	56.9504	37.8519	0.132789	0.54488	-4.17486	8.26077	0.533961	0.894939	1.82605	14.5313	0.954562	0.970029	26.4036	20.6718	0.218362	0.614294	-72.0582	35.2255	0.0388249	0.610461
testis	0.91967	18.5277	0.996487	0.996487	-4.26126	17.2792	0.758458	0.86968	-5.21925	6.53792	0.341055	0.740672	-6.98171	6.08762	0.190507	0.755491	13.8703	12.2858	0.2915	0.664549	13.2841	25.6508	0.630999	0.985867
thoracic_aorta	-185.373	48.1003	0.000378806	0.029168	-145.744	52.0314	0.00663619	0.170329	-8.03111	28.4569	0.751538	0.996355	-27.9086	47.0041	0.538325	0.825606	17.5067	77.6129	0.830967	0.914064	9.87806	157.494	0.955046	0.985867
thyroid_gland	32.4573	20.1285	0.128605	0.707326	40.4887	18.4267	0.044164	0.42247	11.512	5.32003	0.0491386	0.270263	11.0295	7.8449	0.200015	0.755491	-6.14592	6.9927	0.310698	0.664549	22.4294	15.6476	0.173409	0.918673
tibial_nerve	43.5327	71.572	0.545548	0.763758	17.9389	54.4	0.753172	0.86968	-23.6101	12.3563	0.0468914	0.270263	-16.1792	19.186	0.368656	0.785175	33.8191	41.3498	0.425616	0.780296	15.7452	78.4381	0.85128	0.985867
transverse_colon	37.4343	34.0287	0.284737	0.740944	47.8494	37.7617	0.211118	0.636554	-24.6271	7.32035	0.000613496	0.0236196	-6.35604	11.3912	0.516905	0.825606	7.0838	24.6012	0.804844	0.914064	24.8999	44.5818	0.591888	0.977908
Treg_Primary_Cells	-8.58105	25.3999	0.704529	0.828607	-11.2459	19.0888	0.528815	0.759345	-11.6833	6.81541	0.0630052	0.285376	6.12795	10.7545	0.634028	0.865081	8.29262	23.6234	0.757315	0.907582	-30.7168	35.5995	0.369002	0.918673
upper_lobe_of_left_lung	29.5781	32.8926	0.369989	0.740944	89.8806	61.0812	0.137562	0.54488	-9.56952	6.69586	0.115317	0.42283	3.80319	12.0148	0.815559	0.885145	-10.0639	16.509	0.500128	0.785915	-27.3331	29.1628	0.331545	0.918673
uterus	-13.8889	30.6893	0.629917	0.795142	-50.1221	24.2842	0.0483071	0.42247	32.4525	31.3744	0.317417	0.733658	30.4869	19.0462	0.123555	0.727585	31.5856	28.0766	0.272544	0.664549	37.2552	51.6975	0.481075	0.926068
vagina	-24.0487	21.6502	0.244248	0.740944	-16.9772	22.7905	0.428332	0.752081	18.2027	9.50844	0.0723831	0.308921	3.342	9.0846	0.796542	0.885145	-1.74534	16.3998	0.867273	0.922813	-25.6799	30.3479	0.382248	0.918673

## Sheet: Supplementary file 1c
Supplementary file 1c. R scores of six phenotypes in 77 human contexts
	LDL			TC			EA			CP			Face			BrainShape
	SpecVar	LDSC-SAP	LDSC-SEG	SpecVar	LDSC-SAP	LDSC-SEG	SpecVar	LDSC-SAP	LDSC-SEG	SpecVar	LDSC-SAP	LDSC-SEG	SpecVar	LDSC-SAP	LDSC-SEG	SpecVar	LDSC-SAP	LDSC-SEG
Adrenal gland	-8.98211	1.63155	8.56547	-15.7767	0.791121	10.2576	59.3661	24.1157	0.628085	3.15325	17.8258	0.186989	-9.41834	-6.38606	0.141213	-4.2857	-0.70854	4.24726
Ammon's horn	-6.69223	-4.3255	2.04969	-8.59399	0.00457344	2.30652	91.7752	41.6279	0.00594246	107.247	4.45363	0.652098	-209.357	0.110156	0.249658	-25.2178	10.0952	0.720239
BE2C	-2.71686	-4.31013	8.86122	-17.5308	-2.1336	6.66899	2.86314	0.0816944	0.0137681	4.52055	-1.98366	0.688599	-0.00367067	-0.00775794	0.958891	-0.243738	0.00921748	0.531359
BJ	-20.2669	7.60948	4.70337	108.189	18.4324	4.61355	-5.11936	-1.451	0.560565	-12.2446	-61.6223	0.592232	42.9553	-1.67412	0.434721	-25.9647	66.0806	5.43381
Body of pancrea	151.314	47.7583	11.0942	3.48553	0.000272248	9.29617	-183.744	343.469	0.0718932	-61.0552	186.551	0.436655	-2.65857	-11.4271	0.177118	10.6664	0.169806	2.28712
Breast epithelium	-10.5815	-2.78871	12.396	-40.4967	-24.6001	10.975	-23.6708	-10.1538	0.498791	-9.1645	-0.201985	0.125521	-36.3324	2.57436	0.00285161	-68.8547	-72.1569	1.1226
Caudate nucleus	-2.36902	-4.36313	1.23638	-0.603364	-5.29163	1.00915	17.2196	31.5837	0.343753	7.61859	0.0955437	1.12766	3.39281	-26.1828	0.284822	-1.49166	-17.2883	0.523206
CD4 primary cells	24.646	-7.95941	8.20739	18.1844	-2.58683	6.29521	-4.38027	-0.015958	0.439954	0.397777	-2.16146	1.11402	35.7515	-15.8647	0.339857	0.831165	5.20537	0.493677
CD8 primary cells	10.0674	-0.257484	8.41115	1.05102	1.56872	6.00256	2.62122	-2.69822	0.491254	-19.5206	-12.6293	0.338493	0.195033	35.3017	0.0581821	0.00753903	-33.3552	0.0464322
Cerebellum	110.15	27.7833	2.3268	75.1417	34.4794	1.30011	45.2887	19.9058	3.76951	30.1514	5.9472	4.35397	0.440776	19.7484	0.292141	30.9896	0.593413	0.599172
CNCC	-13.3803	-452.882	7.05859	-32.9514	-322.5	8.14763	-0.895296	0.0306304	0.1499	9.34316	0.0641624	0.473036	134.952	1.71746	1.29953	512.561	16.528	6.27467
Esophagus muscularis mucosa	39.5841	-0.139571	8.17221	16.4906	-0.0104481	7.76946	-19.3111	-1.90884	0.454693	-0.551178	-0.300351	1.03558	-12.6649	4.0955	2.21694	28.2308	-8.0843	8.00291
Esophagus squamous epithelium	26.6069	16.3725	5.06329	53.5926	20.0606	5.38107	-31.7549	-14.1243	1.06067	-5.19073	-0.0847584	0.862746	12.4159	-0.388208	0.566246	0.00560709	-1.87246	2.1012
Fetal adrenal gland	123.517	99.7278	20.2514	216.742	103.309	17.3679	0.565985	1.42346	0.733592	-4.40432	3.67476	0.912606	0.246508	-0.02955	0.021579	3.09333	0.71777	1.4169
Fetal heart	-64.5744	-108.852	1.72266	-79.5932	-143.742	1.87561	-2.03588	8.06683	1.10157	-3.26245	39.7406	0.735082	-4.91469	9.6725	0.0557737	9.76327	3.21594	2.56387
Fetal intestine large	92.085	0.0132597	14.0385	89.2117	0.0474559	12.5003	-11.639	-4.31262	1.2592	-1.16083	2.68823	0.888688	25.22	-18.8049	0.65491	65.4888	-4.39795	0.0732199
Fetal intestine small	10.8958	16.226	16.106	4.38139	61.6785	16.3442	-0.00315837	-12.4828	1.27867	8.06818	-0.276616	0.959591	-12.2779	-29.8389	0.362717	-10.3821	-0.766601	0.0125961
Fetal kidney	51.4653	-43.1068	6.61471	18.0097	-84.3782	9.74708	-27.3632	6.29386	0.8969	0.747811	0.527581	0.564218	6.68534	57.216	2.6051	5.1537	17.6008	2.09907
Fetal lung	3.20011	-43.5244	2.3304	-0.126956	-61.552	1.67224	0.0109543	0.118898	0.767347	1.70999	-0.0174015	0.061207	0.00894107	67.1518	2.12566	22.0452	30.3884	4.3553
Fetal muscle	20.5568	2.48361	6.13119	3.56108	0.0129121	5.04183	-1.19735	-6.22308	0.834829	-1.39921	-4.359	1.3825	18.2063	45.3385	0.830546	28.5098	53.8487	1.08704
Fetal ovary	9.54355	-0.721408	5.0822	12.4831	-11.3167	4.44176	-1.85981	21.0204	0.795324	-0.930815	20.4183	0.0945209	-0.171754	-29.3551	1.53698	44.5459	3.74574	0.224923
Fetal renal cortex	-7.17517	-45.149	7.42397	-7.39302	-42.2165	9.41165	-7.84954	-10.4986	0.908535	-17.0615	-4.02705	1.17575	0.200098	20.9264	2.07086	31.8079	3.47423	2.30072
Fetal renal pelvis	-146.387	0.740483	6.85765	-0.114	1.0413	8.65927	-10.165	0.702063	0.776978	1.24829	14.6081	1.09792	-0.0058548	3.98354	3.77248	-46.4821	-12.4471	2.84276
Fetal spinal cord	10.155	-98.8743	4.44741	34.9384	-188.971	3.29444	3.5178	129.346	1.58817	15.6111	185.953	2.07791	-92.4598	-5.88548	0.00562064	44.2242	0.0167483	2.81887
Fetal spleen	-0.00438426	-8.84654	12.5079	3.39587	-19.1635	9.33191	-4.37153	-5.34266	1.28839	24.5802	-27.7981	0.807197	3.22532	-37.1071	0.141526	2.43395	0.371368	1.35607
Fetal stomach	43.9953	-0.0609631	7.24652	21.0673	-3.06411	6.88727	11.7085	3.54753	1.14455	1.32028	21.9427	1.10205	-0.0514806	27.797	0.315136	1.5171	0.501971	0.9236
Fetal thymus	33.24	9.70691	3.01768	51.5748	19.9833	3.49032	0.00577561	-0.719717	0.78659	-4.92971	2.5361	0.196026	59.3419	45.3616	0.0731624	11.4358	0.271865	0.0351948
Fibroblasts	-0.00415195	0.167189	5.2999	1.86099	0.0019609	4.73284	-1.51202	2.35477	0.988413	-18.07	0.40748	0.220027	128.81	54.7084	7.56117	67.1533	57.2044	10.7927
Foreskin fibroblast	23.736	5.38329	10.5967	5.33781	4.24536	12.4699	-0.196721	-8.37939	0.209979	-10.1543	-4.45791	0.908556	-2.21112	213.945	2.94328	46.4386	8.05092	13.4078
Foreskin keratinocyte	6.22099	9.10206	7.2731	14.9197	21.6836	11.0741	-0.402068	-1.93766	0.296811	-0.636097	-6.21346	0.257458	-3.27923	2.59355	0.210025	38.1544	-0.108096	0.837652
Frontal cortex	146.543	112.251	3.01003	69.9812	77.553	3.80263	167.234	0.212407	3.07996	216.618	7.56763	3.08467	11.1251	-10.3304	0.151288	10.9036	-0.0324108	0.205674
Gastric	13.9758	-12.2962	8.19856	1.1486	-3.23852	7.96264	11.8514	-4.51573	1.06147	-6.82793	24.504	0.971414	-69.6199	12.6771	0.352485	-11.1829	0.0496682	0.301307
Gastrocnemius medialis	128.024	83.3744	13.3888	74.5568	55.5551	12.3509	0.00153244	0.0155809	1.17729	0.935148	12.3806	1.74917	-0.636761	6.46998	0.206346	0.993465	35.0623	3.91904
Gastroesophageal sphincter	-1.99387	-0.393692	2.64332	0.854054	0.0610796	3.21528	0.125733	-153.238	0.616278	-106.796	-1.03728	1.19933	53.5148	-0.94811	0.834251	109.984	-21.8079	6.41298
GM12878	20.8344	9.73201	8.7093	43.81	-7.97419	7.03212	-49.0534	-14.2269	0.664694	0.00210629	5.23615	0.278835	0.153675	-31.6954	0.235306	-251.677	28.5277	0.506766
H1-hESC	20.39	-18.6601	14.2216	26.5071	7.17753	13.5408	-0.0296569	-27.3079	0.172426	-1.00249	-131.184	0.484348	7.92452	2.6386	0.370342	19.5626	198.935	0.012676
H7-hESC	99.2926	4.37576	7.15758	130.725	7.56585	8.2785	-0.000326836	1.74066	0.121173	0.20764	3.71659	0.156737	10.5829	-0.0929775	0.455553	13.9184	9.23671	0.0341627
Heart left ventricle	-208.971	-0.675764	4.99925	-489.412	0.435513	5.46688	13.2055	-107.184	0.666904	-2.10361	4.74733	0.0350548	-119.151	-52.2035	0.0370661	-191.914	-17.3001	0.757952
HeLa-S3	0.238684	98.5745	3.89116	-2.88127	60.1762	3.01863	-0.113739	-9.42263	0.978747	-5.66348	-3.90679	0.436718	12.4771	-1.39034	0.300094	23.932	-6.4238	0.0582509
Hematopoietic multipotent progenitor cell	-4.13002	-1.00844	3.87758	-2.12356	-7.09694	4.1127	-0.133619	69.4158	1.10046	1.39595	2.40205	0.0394152	-2.35418	135.5	0.369674	-0.00547181	-166.193	0.207193
HepG2	1.02407	-4.40212	26.2355	19.8719	0.0530918	30.1089	-76.1572	-7.26245	0.462805	-0.918077	-43.6465	3.01078	-138.567	-91.6333	0.0350713	6.41742	-5.84934	1.15783
Jurkat	3.56866	3.17388	7.82614	1.20802	0.962153	7.38849	3.38083	-2.9754	0.685701	9.73303	-0.408856	0.297153	-0.20954	-4.82683	0.320498	-119.204	11.8211	0.376857
K562	3.51464	37.5885	7.32653	-2.36153	49.3966	7.0383	-12.3523	-4.75014	1.32826	15.2471	0.0842687	1.15442	0.147328	18.5001	0.317766	28.8706	77.4315	0.0764057
Lower leg skin	24.8805	12.4428	4.82085	4.75907	0.782477	6.60684	-44.294	-0.0347354	1.50585	-11.4431	-0.470727	0.616863	16.2921	2.79794	0.051081	-0.179919	0.0852661	2.32259
MCF-7	39.8394	-0.524193	4.80011	23.7921	-16.3143	3.81051	0.376399	0.00708632	0.205482	-1.91651	0.000588303	0.44368	-0.605653	6.67268	0.0575141	-1.83107	-19.2244	0.540924
Melanocyte	68.4878	0.352499	13.3827	29.7661	-0.401156	10.0784	0.905885	-0.00978328	0.24889	5.81343	-2.63717	2.00936	6.82367	0.00395286	0.0356866	36.6874	-1.45979	4.54571
Omental fat pad	31.8218	-1.95786	22.7745	30.9483	-5.72065	23.5422	-4.63403	0.0940139	0.930919	0.0606494	0.453342	0.17414	1.56616	-9.88108	3.51219	-29.1241	-8.37158	5.6521
Ovary1	8.61559	64.4907	13.6275	10.551	41.3513	13.2454	-0.285408	26.5073	1.25285	0.0452081	0.872577	0.336015	90.2532	87.9515	3.57417	19.817	0.0574964	4.43351
Ovary2	-7.31091	4.589	8.35497	-80.0887	17.759	7.74113	-2.86776	3.05767	0.100567	-19.9966	-1.34608	0.264066	8.23206	6.56617	1.58923	1.56405	-117.201	1.07562
Panc1	11.0102	3.36045	11.0041	40.0607	4.90507	11.1996	-60.8046	-0.0124971	0.434074	-41.4548	-7.94312	0.212703	-28.0222	-0.34369	0.263161	-54.5978	-10.6738	1.10941
Pancreas	6.22924	-1.09647	15.8915	1.07528	-2.31235	14.288	0.013723	0.323113	0.584047	-5.51868	-12.9321	0.749999	2.23854	-18.9805	0.264109	-4.41728	8.74144	0.111317
Peyer's_patch	21.3633	31.053	19.4567	82.1035	11.8143	19.5033	-8.58643	0.0185896	0.186517	1.96699	1.12705	0.0651202	-7.04859	10.2066	0.293778	11.4847	0.174475	3.01401
Primary B cells	0.912762	53.0069	6.71911	10.4756	84.9976	4.94	3.57558	0.812318	0.977109	7.21926	17.0529	0.357363	-20.4066	-107.46	0.282302	-7.18079	7.30517	0.438116
Primary hematopoietic stem cells	16.0959	0.557202	4.96786	3.62498	0.485164	3.86911	-3.88587	0.635407	0.70662	-3.01022	1.13598	0.108471	-8.08728	-0.109341	0.231607	2.80892	7.9018	0.839465
Primary monocytes	12.3452	88.7369	11.9362	56.2745	66.0776	11.0903	-3.39696	0.494247	1.59686	0.370896	1.20705	0.0201767	-0.00230133	-0.0556572	1.03185	-1.78427	5.45868	0.180074
Primary natural killer cells	37.3875	-1.61996	2.5949	20.8616	-3.79342	2.24859	-0.401365	-244.049	0.131629	-101.377	-252.147	0.291379	-536.74	-84.9507	0.153549	0.059558	0.0658828	1.51089
Primary T cells	2.65108	8.3755	5.84959	-16.3703	3.97129	4.39205	0.0377387	30.2308	0.37276	8.92327	30.61	0.532637	2.32302	-97.4499	0.0592254	-15.6464	-51.8025	0.398477
Prostate_gland	42.0438	-24.0572	6.6181	57.6864	-0.640804	8.23351	-21.5862	-0.0667207	0.441539	-0.364067	-2.59098	0.148521	17.9844	19.299	0.0414278	-2.5677	1.54711	0.347929
Psoas muscle	4.75472	1.69425	5.21211	0.985172	0.13371	4.55752	2.90111	13.1588	0.624341	6.86763	0.0021387	0.119897	50.5232	5.9201	0.315557	19.0709	35.1538	0.176566
Putamen	54.3412	-0.210543	0.943384	47.642	0.0978008	1.23943	52.3915	7.50582	0.145635	34.8537	0.242681	0.685919	-5.67562	0.755703	0.260349	80.0155	-4.31806	0.377459
Right atrium auricular region	12.355	-44.2885	7.78068	18.1849	-42.428	8.1887	-0.0553734	-1.14105	0.789533	-1.34757	-6.68951	0.323411	-31.3555	-2.5336	0.272761	-1.04015	0.305735	2.12573
Right lobe of liver	722.739	-13.8389	19.6214	714.754	-19.2983	28.786	-0.068266	10.1293	1.34012	8.52688	-13.9465	0.982356	-36.4841	-25.0368	0.256339	4.58912	0.395952	0.436309
Sigmoid colon	-138.376	-25.6627	4.9229	-60.9647	-68.4209	4.18563	-0.277444	-0.146471	0.602104	-15.5657	-21.5351	0.0973224	84.6468	-15.9256	8.76822	-1.63265	-3.19897	5.91051
Spleen	-0.65205	-0.839844	8.46213	-2.77669	0.0151387	9.20234	0.190571	-3.96941	0.584369	1.90347	0.0514765	0.21254	6.99142	1.96657	0.571057	-0.0495768	0.174113	0.310237
Stomach	3.13117	-4.19597	10.2256	25.8666	-7.16681	10.2608	0.00150112	0.0120666	1.4478	26.9117	-0.0923867	0.345523	0.157098	84.9922	0.0543327	-50.7038	8.62691	0.33067
Subcutaneous adipose tissue	-132.302	-47.9445	19.9151	-289.783	-193.8	21.7582	-7.42342	24.7317	1.02052	-44.0939	19.1983	0.381049	7.89942	-82.9521	0.397922	19.2276	-29.3229	3.78045
T47D	50.6437	0.0888706	3.59065	49.9363	-1.79844	3.03119	-1.13761	-3.23094	0.337905	0.0368789	-23.8603	0.288371	-101.666	7.5018	0.109901	17.4481	0.00272268	1.67408
Testis	0.00140542	2.41422	5.49088	-0.511642	4.23101	6.50135	-2.43831	-2.45637	0.556567	-5.02745	-0.0268594	0.503525	2.65644	12.3326	1.41567	7.42561	0.00448624	0.469675
Thoracic aorta	-634.268	-468.317	24.6283	-317.442	-722.972	25.8276	-0.99625	-2.90816	1.48505	-7.50619	-186.415	0.201125	0.197319	-47.5261	1.02984	1.40783	-60.0337	9.907
Thyroid gland	28.9111	50.1235	7.45953	54.8594	74.8916	6.2386	15.0644	0.318302	0.505937	7.7089	4.65837	0.214356	17.0672	0.995055	0.971246	-3.12004	21.628	2.98713
Tibial nerve	11.4564	-9.02894	14.0124	2.20838	-0.260891	18.0626	-31.3757	-7.18441	0.397132	-7.01173	1.00927	0.055296	1.10102	23.562	1.4679	12.5463	-84.2037	18.2075
Transverse colon	20.4225	0.228532	9.65138	32.321	-2.86426	10.3174	-79.1068	3.65071	1.41791	-1.82157	5.96676	0.142276	5.6712	-48.6301	0.0424853	0.667918	-1.25524	0.434636
Treg primary cells	-1.30519	-0.0163202	18.0097	-3.11169	0.081193	15.2408	-14.0273	-1.43185	1.10853	1.21267	-0.455799	0.584884	-13.2995	-38.7694	0.126589	1.00112	9.02829	0.953518
Trophoblast cultured cells	80.494	-2.14036	6.83439	76.468	4.12529	7.87645	1.37397	0.0973435	1.17082	1.84295	0.222297	0.208895	16.5842	1.17139	0.356625	144.153	1.16076	4.16837
Upper lobe of left lung	12.7721	-0.514031	15.0854	77.4323	-2.2966	15.8975	-8.97722	-2.21762	1.05648	0.336752	0.0354418	0.0480257	-13.1051	0.286084	2.18675	-3.02841	-9.61554	4.68337
Uterus	-2.78774	-0.00468971	2.74085	-65.9602	-2.05198	2.49374	16.1733	-0.109728	1.19368	27.6864	7.65361	0.0812768	11.8392	0.692119	0.130384	17.832	-1.76498	1.34045
Vagina	-14.7219	-1.7503	6.31879	-6.25135	-4.07388	7.22858	20.7576	0.475949	1.05755	0.33016	-0.127264	0.17672	-10.7253	-1.97388	2.80626	-0.107939	-8.55309	3.51727

## Sheet: Supplementary file 1d
Supplementary file 1d: 206 phenotypes selected from UKBB and their top relevant contexts
Class	phenotype	description	Abbreviation	variable_type	source	n_non_missing	n_controls	n_cases	Ne-5	N5e-8	Relevant contexts
Cancer	II_NEOPLASM	Neoplasms	NEOPLASM	categorical	finngen	361194	291016	70178	2146	630	Melanocyte,Primary_B_cells_from_peripheral_blood
	C3_SKIN	Malignant neoplasm of skin	SKIN	categorical	finngen	361194	344663	16531	14057	8426	HeLa-S3,Jurkat,GM12878,Panc1
	C3_OTHER_SKIN	Other malignant neoplasms of skin	OTHER_SKIN	categorical	finngen	361194	346792	14402	14983	8376	Jurkat,HeLa-S3,Panc1,GM12878
Disease	K80	Cholelithiasis	Cholelithiasis	categorical	icd10	361194	350674	10520	4480	1639	frontal_cortex
	K11_GALLBILPANC	Disorders of gallbladder, biliary tract and pancreas	GALLBILPANC	categorical	finngen	361194	347272	13922	3639	1439	gastroesophageal_sphincter,HepG2,frontal_cortex
	H26	Other cataract	Other cataract	categorical	icd10	361194	349888	11306	2133	510	right_lobe_of_liver,thoracic_aorta,CNCC,CD8_Primary_Cells
	H7_LENS	Disorders of lens	LENS	categorical	finngen	361194	344118	17076	2984	654	heart_left_ventricle,K562,CNCC
	K40	Inguinal hernia	Inguinal_hernia	categorical	icd10	361194	348047	13147	7858	2318	H1-hESC,ovary,gastroesophageal_sphincter
	K11_HERNIA	Hernia	HERNIA	categorical	finngen	361194	334997	26197	5038	1939	gastroesophageal_sphincter,Gastric,Primary_B_cells_from_peripheral_blood,sigmoid_colon,Primary_T_cells_from_cord_blood
	XIV_GENITOURINARY	Diseases of the genitourinary system	GENITOURINARY	categorical	finngen	361194	289574	71620	3843	864	HepG2,gastroesophageal_sphincter,Fetal_Ovary,Fetal_Renal_Pelvis
	R31	Unspecified haematuria	Haematuria	categorical	icd10	361194	349911	11283	10979	6204	esophagus_muscularis_mucosa,caudate_nucleus,Primary_T_cells_from_cord_blood
	I9_CORATHER	Coronary atherosclerosis	CORATHER	categorical	finngen	361194	346860	14334	6290	2398	gastroesophageal_sphincter,Fetal_Ovary,prostate_gland,breast_epithelium,Fetal_Intestine_Large
	G6_NERPLEX	Nerve, nerve root and plexus disorders	NERPLEX	categorical	finngen	361194	350296	10898	2536	544	Primary_T_cells_from_cord_blood,Primary_Natural_Killer_cells_from_peripheral_blood
	20002_1265	Non-cancer illness code, self-reported: migraine	Migraine	binary	phesant	361141	350494	10647	2727	1111	gastroesophageal_sphincter
	I9_DISVEINLYMPH	Diseases of veins, lymphatic vessels and lymph nodes, not elsewhere classified	DISVEINLYMPH	categorical	finngen	361194	349327	11867	4791	1320	ovary,body_of_pancrea
	III_BLOOD_IMMUN	Diseases of the blood and blood-forming organs and certain disorders involving the immune mechanism	BLOOD_IMMUN	categorical	finngen	361194	351099	10095	5073	2009	thoracic_aorta,GM12878
	6152_8	Asthma diagnosed by doctor	Asthma	binary	phesant	360527	318894	41633	37013	23186	Primary_T_cells_from_cord_blood,Primary_Natural_Killer_cells_from_peripheral_blood
	6152_9	Hayfever, allergic rhinitis or eczema diagnosed by doctor	Hayfever_allergic_rhinitis_eczema	binary	phesant	360527	277120	83407	40144	21749	CD4_Primary_Cells,Primary_T_cells_from_cord_blood,Primary_Natural_Killer_cells_from_peripheral_blood,spleen,Fetal_Stomach,HeLa-S3
	I25	Chronic ischaemic heart disease	CIHD	categorical	icd10	361194	348425	12769	6116	2236	Fetal_Ovary,gastroesophageal_sphincter,prostate_gland,Foreskin_Fibroblast_Primary_Cells_skin02,breast_epithelium,Fetal_Intestine_Large
	I9_IHD	Ischaemic heart disease, wide definition	IHD	categorical	finngen	361194	340337	20857	7413	2145	Primary_B_cells_from_peripheral_blood,gastroesophageal_sphincter,Foreskin_Fibroblast_Primary_Cells_skin02
	I9_CHD_NOREV	Major coronary heart disease event excluding revascularizations	CHD_NOREV	categorical	finngen	361194	351037	10157	2917	1199	Primary_B_cells_from_peripheral_blood,Fetal_Intestine_Large
	I9_CHD	Major coronary heart disease event	CHD	categorical	finngen	361194	351037	10157	2917	1199	Primary_B_cells_from_peripheral_blood,Fetal_Intestine_Large
	6150_4	Vascular/heart problems diagnosed by doctor: High blood pressure	HighBloodPressure	binary	phesant	360420	263281	97139	58062	23667	CNCC,adrenal_gland,Fetal_Spleen,Fetal_Ovary,Fetal_Renal_Pelvis
	20002_1074	Non-cancer illness code, self-reported: angina	Angina	binary	phesant	361141	349771	11370	3352	1250	heart_left_ventricle,Primary_monocytes_from_peripheral_blood,CD8_Primary_Cells,Fetal_Ovary
	IX_CIRCULATORY	Diseases of the circulatory system	CIRCULATORY	categorical	finngen	361194	300690	60504	1757	517	gastroesophageal_sphincter,Fetal_Intestine_Large,prostate_gland
	XIII_MUSCULOSKELET	Diseases of the musculoskeletal system and connective tissue	MUSCULOSKELET	categorical	finngen	361194	284095	77099	7743	502	frontal_cortex,Fetal_Ovary,HepG2,H1-hESC,putamen
	M13_MENISCUSDERANGEMENTS	Meniscus derangement	MENISCUSDERANGEMENTS	categorical	finngen	361194	350363	10831	1575	671	Fetal_Ovary,HepG2,subcutaneous_adipose_tissue,body_of_pancrea,Ovary,ovary
	2443	Diabetes diagnosed by doctor	Diabetes	binary	phesant	360192	342917	17275	18528	10133	H1-hESC,HepG2,Fetal_Renal_Pelvis,Ammons_horn,frontal_cortex,transverse_colon
	20002_1065	Non-cancer illness code, self-reported: hypertension	Hypertension	binary	phesant	361141	267581	93560	57062	23750	CNCC,adrenal_gland,Fetal_Spleen,H7-hESC
	20002_1473	Non-cancer illness code, self-reported: high cholesterol	High_cholesterol	binary	phesant	361141	317184	43957	18785	8713	right_lobe_of_liver,Psoas_Muscle
	6153_2	Blood pressure medication	BloodPressureMed	binary	phesant	193148	159629	33519	19280	5808	CNCC,adrenal_gland,cerebellum,heart_left_ventricle,Fetal_Spleen,Fetal_Ovary
	6177_1	Cholesterol lowering medication	CholesterolLowMed	binary	phesant	165340	127283	38057	10485	4428	Ammons_horn,H1-hESC,H7-hESC,right_lobe_of_liver,Fetal_Adrenal_Gland,Peyers_patch
	20002_1226	Non-cancer illness code, self-reported: hypothyroidism/myxoedema	Ypothyroidism_myxoedema	binary	phesant	361141	343567	17574	44992	28264	GM12878,Primary_B_cells_from_peripheral_blood,Primary_T_cells_from_cord_blood,upper_lobe_of_left_lung
Physical examination	102_irnt	Pulse rate, automated reading	Pulse_rate_auto	continuous_irnt	phesant	340162	NA	NA	64953	30760	heart_left_ventricle,Fetal_Heart,putamen
	4194_irnt	Pulse rate	Pulse_rate	continuous_irnt	phesant	118850	NA	NA	15636	7374	putamen,heart_left_ventricle,Fetal_Heart,tibial_nerve
	4079_irnt	Diastolic blood pressure, automated reading	Diastolic_blood_pressure	continuous_irnt	phesant	340162	NA	NA	65780	25749	heart_left_ventricle,Fetal_Ovary,Psoas_Muscle,gastroesophageal_sphincter,BE2C,tibial_nerve
	4080_irnt	Systolic blood pressure, automated reading	Systolic_blood_pressure	continuous_irnt	phesant	340159	NA	NA	72243	26094	Psoas_Muscle,HepG2,gastroesophageal_sphincter
	30510_irnt	Creatinine (enzymatic) in urine	CreatinineUrine	continuous_irnt	phesant	350812	NA	NA	8025	1221	cerebellum,putamen,H7-hESC
	30520_irnt	Potassium in urine	PotassiumUrine	continuous_irnt	phesant	350053	NA	NA	6835	2047	Jurkat,frontal_cortex,transverse_colon
	30530_irnt	Sodium in urine	SodiumUurine	continuous_irnt	phesant	350061	NA	NA	11799	2504	Fetal_Ovary,cerebellum,BE2C,adrenal_gland
	1210	Snoring	Snoring	binary	phesant	336320	210664	125656	11209	4415	Psoas_Muscle,frontal_cortex,gastroesophageal_sphincter,H1-hESC
Craniofacial bone	1717	Skin colour	Skin_colour	ordinal	phesant	356530	NA	NA	46949	31105	Melanocyte,GM12878
	1727	Ease of skin tanning	Ease_skin_tanning	ordinal	phesant	353697	NA	NA	42981	30527	Melanocyte,GM12878,Gastric
	2267	Use of sun/uv protection	SunUv_Protection	ordinal	phesant	358559	NA	NA	12112	5406	Melanocyte,esophagus_muscularis_mucosa
	1757	Facial ageing	Facial_ageing	ordinal	phesant	330409	NA	NA	16335	6142	Melanocyte,GM12878,Panc1,H1-hESC
	1747_3	Hair colour (natural, before greying): Light brown	HairLightBrown	binary	phesant	360270	212710	147560	17387	11109	tibial_nerve,GM12878,Melanocyte
	1747_1	Hair colour (natural, before greying): Blonde	HairBlonde	binary	phesant	360270	319092	41178	53884	31258	Melanocyte,lower_leg_skin,esophagus_muscularis_mucosa,GM12878
	1747_2	Hair colour (natural, before greying): Red	HairRed	binary	phesant	360270	343655	16615	18165	13408	Jurkat,HepG2,HeLa-S3,heart_left_ventricle,Primary_Natural_Killer_cells_from_peripheral_blood
	1747_4	Hair colour (natural, before greying): Dark brown	HairDarkBrown	binary	phesant	360270	225643	134627	51160	33467	Melanocyte,Panc1,GM12878
	1747_5	Hair colour (natural, before greying): Black	HairBlack	binary	phesant	360270	344461	15809	21541	13764	Melanocyte,GM12878,esophagus_muscularis_mucosa
	2395_1	Hair/balding pattern: Pattern 1	HairPattern1	binary	phesant	165649	112573	53076	57341	34771	Fetal_Ovary,CNCC,Melanocyte
	2395_2	Hair/balding pattern: Pattern 2	HairPattern2	binary	phesant	165649	127605	38044	15529	7431	Jurkat,Fetal_Renal_Pelvis,Foreskin_Fibroblast_Primary_Cells_skin02,lower_leg_skin,Fetal_Renal_Cortex
	2395_3	Hair/balding pattern: Pattern 3	HairPattern3	binary	phesant	165649	121345	44304	16184	10793	Fetal_Renal_Pelvis,Primary_T_cells_from_cord_blood,Fetal_Ovary
	2395_4	Hair/balding pattern: Pattern 4	HairPattern4	binary	phesant	165649	135424	30225	51442	30877	T47D
	2247_0	Hearing difficulty/problems: No	HearinNo	binary	phesant	346635	90797	255838	12637	1493	Melanocyte,H7-hESC
	2247_1	Hearing difficulty/problems: Yes	HearingYes	binary	phesant	346635	255925	90710	12638	1430	Melanocyte,H7-hESC
	2257	Hearing difficulty/problems with background noise	HearingBackgroundNoise	binary	phesant	353983	219842	134141	10709	1293	frontal_cortex,adrenal_gland,Melanocyte,Ammons_horn,MCF-7
	5254_irnt	Intra-ocular pressure, corneal-compensated (right)	IntraOcularPressureCornealRight	continuous_irnt	phesant	76630	NA	NA	7783	2012	gastroesophageal_sphincter,thoracic_aorta,Fibroblasts,tibial_nerve,CNCC
	5255_irnt	Intra-ocular pressure, Goldmann-correlated (right)	IntraOcularPressureGoldmannRight	continuous_irnt	phesant	76630	NA	NA	16954	6124	tibial_nerve,CNCC,Fibroblasts
	5256_irnt	Corneal hysteresis (right)	CornealHysteresisRight	continuous_irnt	phesant	76630	NA	NA	12581	5550	gastroesophageal_sphincter,thoracic_aorta
	5257_irnt	Corneal resistance factor (right)	CornealResistanceRight	continuous_irnt	phesant	76630	NA	NA	21551	9750	tibial_nerve,gastroesophageal_sphincter,frontal_cortex
	5262_irnt	Intra-ocular pressure, corneal-compensated (left)	IntraOcularPressureCornealLeft	continuous_irnt	phesant	76510	NA	NA	7265	2498	gastroesophageal_sphincter,tibial_nerve,HeLa-S3,MCF-7,CNCC,Fibroblasts
	5263_irnt	Intra-ocular pressure, Goldmann-correlated (left)	IntraOcularPressureGoldmannLeft	continuous_irnt	phesant	76510	NA	NA	15150	5554	tibial_nerve,gastroesophageal_sphincter,Fibroblasts,CNCC,MCF-7
	5264_irnt	Corneal hysteresis (left)	CornealHysteresisLeft	continuous_irnt	phesant	76510	NA	NA	11702	4519	frontal_cortex,uterus,thyroid_gland,Foreskin_Fibroblast_Primary_Cells_skin02,gastroesophageal_sphincter,ovary
	5265_irnt	Corneal resistance factor (left)	CornealResistanceLeft	continuous_irnt	phesant	76510	NA	NA	19232	8759	frontal_cortex,Foreskin_Fibroblast_Primary_Cells_skin02,uterus,ovary
Intelligence and education	6138_3	Qualifications: O levels/GCSEs or equivalent	Olevels_GCSEs	binary	phesant	357549	188877	168672	4000	750	caudate_nucleus,Jurkat,heart_left_ventricle
	6138_1	Qualifications: College or University degree	College_University_degree	binary	phesant	357549	241568	115981	70938	24454	Ammons_horn,frontal_cortex,cerebellum,putamen,adrenal_gland
	6138_2	Qualifications: A levels/AS levels or equivalent	A_levels_AS_levels	binary	phesant	357549	259245	98304	22753	4749	frontal_cortex,Ammons_horn,cerebellum
	845	Age completed full time education	Age_full_time_education	ordinal	phesant	240547	NA	NA	12175	3255	putamen,frontal_cortex,adrenal_gland,heart_left_ventricle
	22501_irnt	Year ended full time education	Year_full_time_education	continuous_irnt	phesant	91777	NA	NA	6908	2216	frontal_cortex,gastroesophageal_sphincter,Foreskin_Fibroblast_Primary_Cells_skin02
	20016_irnt	Fluid intelligence score	Fluid_intelligence_score	continuous_irnt	phesant	117131	NA	NA	17014	3408	frontal_cortex
	20128	Number of fluid intelligence questions attempted within time limit	Num_fluid_intelligence_questions	ordinal	phesant	117131	NA	NA	5097	1662	tibial_nerve
Emotional and nerve traits	20127_irnt	Neuroticism score	Neuroticism	continuous_irnt	phesant	293006	NA	NA	30582	11795	heart_left_ventricle,GM12878,Fetal_Spinal_Cord,Primary_B_cells_from_peripheral_blood
	1920	Mood swings	Mood_swings	binary	phesant	352604	193622	158982	17692	6412	Fetal_Spinal_Cord
	1930	Miserableness	Miserableness	binary	phesant	355182	203430	151752	18064	6800	Fetal_Spinal_Cord,Primary_B_cells_from_peripheral_blood
	1940	Irritability	Irritability	binary	phesant	345231	248369	96862	18560	8743	Ammons_horn,Fetal_Intestine_Large,Fetal_Stomach
	1950	Sensitivity / hurt feelings	Sensitivity_hurt_feelings	binary	phesant	350821	156066	194755	13619	6536	heart_left_ventricle,Fetal_Spinal_Cord,Jurkat
	1960	Fed-up feelings	Fed-up_feelings	binary	phesant	353764	210432	143332	18501	7582	frontal_cortex,body_of_pancrea,Primary_B_cells_from_peripheral_blood
	1970	Nervous feelings	Nervous_feelings	binary	phesant	351829	268709	83120	21309	8614	Primary_B_cells_from_peripheral_blood,H1-hESC
	1980	Worrier / anxious feelings	Worrier_anxious	binary	phesant	351833	152370	199463	24170	10989	GM12878,heart_left_ventricle,Primary_B_cells_from_peripheral_blood
	1990	Tense / 'highly strung'	Tense	binary	phesant	350159	289646	60513	12213	1587	frontal_cortex,right_lobe_of_liver,caudate_nucleus,Fetal_Ovary,heart_left_ventricle
	2000	Worry too long after embarrassment	Worry	binary	phesant	346527	181217	165310	12057	1921	Jurkat,adrenal_gland,Psoas_Muscle
	2010	Suffer from 'nerves'	Nerves	binary	phesant	348082	274144	73938	7234	2008	Primary_B_cells_from_peripheral_blood,HepG2
	2030	Guilty feelings	Guilty	binary	phesant	351907	251779	100128	10670	966	heart_left_ventricle,Gastric,H1-hESC,GM12878,K562,Fetal_Spinal_Cord
	2040	Risk taking	Risk_taking	binary	phesant	348549	258049	90500	8300	1478	Fetal_Spleen,Fetal_Spinal_Cord,lower_leg_skin
	2090	Seen doctor (GP) for nerves, anxiety, tension or depression	NervAnxTensDep	binary	phesant	358693	235165	123528	12302	3321	putamen
	1200	Sleeplessness / insomnia	Sleeplessness	ordinal	phesant	360738	NA	NA	10150	1830	heart_left_ventricle
	1220	Daytime dozing / sleeping (narcolepsy)	Narcolepsy	ordinal	phesant	359752	NA	NA	8941	3840	BE2C,ovary,Primary_T_cells_from_cord_blood
Reproduction	2724	Had menopause	Menopause	binary	phesant	163184	43829	119355	6148	2922	H1-hESC,HepG2,esophagus_squamous_epithelium,frontal_cortex,K562,upper_lobe_of_left_lung
	2754_irnt	Age at first live birth	AgeFirstBirth	continuous_irnt	phesant	131987	NA	NA	8051	1026	cerebellum,heart_left_ventricle,frontal_cortex,Fetal_Ovary
	2764_irnt	Age at last live birth	AgeLastBirth	continuous_irnt	phesant	131806	NA	NA	2156	583	Primary_T_cells_from_cord_blood,Gastric
	2375	Relative age of first facial hair	AgeFirstFacialHair	ordinal	phesant	161470	NA	NA	25552	11778	H1-hESC
	2385	Relative age voice broke	AgeVoiceBroke	ordinal	phesant	154459	NA	NA	10253	5045	H1-hESC
	2714	Age when periods started (menarche)	AgePeriodStarted	ordinal	phesant	188644	NA	NA	41930	18035	HepG2,H1-hESC,caudate_nucleus,cerebellum
	3581_irnt	Age at menopause (last menstrual period)	AgeMenopause	continuous_irnt	phesant	111593	NA	NA	18585	8945	frontal_cortex,HeLa-S3,Fetal_Stomach,gastrocnemius_medialis
	20022_irnt	Birth weight	BirthWeight	continuous_irnt	phesant	205475	NA	NA	19872	6083	ovary,thyroid_gland,Pancreas,H7-hESC,Foreskin_Keratinocyte_Primary_Cells_skin02,Psoas_Muscle
Height, Weight and Strength	20015_irnt	Sitting height	SittingHeight	continuous_irnt	phesant	360066	NA	NA	266692	153551	Fibroblasts,Hematopoietic_multipotent_progenitor_cell,H7-hESC,Foreskin_Keratinocyte_Primary_Cells_skin02,K562
	46_irnt	Hand grip strength (left)	HandGripStrengthLeft	continuous_irnt	phesant	359704	NA	NA	43539	17665	frontal_cortex
	47_irnt	Hand grip strength (right)	HandGripStrengthRight	continuous_irnt	phesant	359729	NA	NA	46407	18514	frontal_cortex,gastrocnemius_medialis
	48_irnt	Waist circumference	Waist	continuous_irnt	phesant	360564	NA	NA	87306	31857	Fetal_Renal_Pelvis,cerebellum,frontal_cortex,right_lobe_of_liver
	49_irnt	Hip circumference	Hip	continuous_irnt	phesant	360521	NA	NA	118019	48207	Fetal_Renal_Pelvis,frontal_cortex,H1-hESC,K562
	50_irnt	Standing height	StandingHeight	continuous_irnt	phesant	360388	NA	NA	378652	227794	Hematopoietic_multipotent_progenitor_cell,K562,H1-hESC,upper_lobe_of_left_lung,BJ,H7-hESC
	1697	Comparative height size at age 10	HeightSize10	ordinal	phesant	355331	NA	NA	166065	90625	frontal_cortex,esophagus_muscularis_mucosa,Psoas_Muscle,H1-hESC,upper_lobe_of_left_lung,Foreskin_Keratinocyte_Primary_Cells_skin02
	2178	Overall health rating	HealthRating	ordinal	phesant	359681	NA	NA	27265	8541	putamen,cerebellum,frontal_cortex,Ammons_horn
	21001_irnt	Body mass index (BMI)	BMI	continuous_irnt	phesant	359983	NA	NA	134440	51998	cerebellum,frontal_cortex,caudate_nucleus,right_lobe_of_liver
	21002_irnt	Weight	Weight	continuous_irnt	phesant	360116	NA	NA	155076	66283	frontal_cortex,Fetal_Renal_Pelvis,H1-hESC
	23099_irnt	Body fat percentage	BodyFatPerc	continuous_irnt	phesant	354628	NA	NA	109278	39899	Fetal_Renal_Pelvis,cerebellum,frontal_cortex,right_lobe_of_liver,esophagus_muscularis_mucosa
	23100_irnt	Whole body fat mass	BodyFatMass	continuous_irnt	phesant	354244	NA	NA	121180	45081	Fetal_Renal_Pelvis,frontal_cortex,cerebellum,caudate_nucleus,right_lobe_of_liver
	23101_irnt	Whole body fat-free mass	BodyFatFreeMass	continuous_irnt	phesant	354808	NA	NA	198015	99319	frontal_cortex,H1-hESC,esophagus_muscularis_mucosa,Psoas_Muscle
	23102_irnt	Whole body water mass	BodyWaterMass	continuous_irnt	phesant	354834	NA	NA	197969	98914	frontal_cortex,H1-hESC,esophagus_muscularis_mucosa,Psoas_Muscle
	23105_irnt	Basal metabolic rate	BMR	continuous_irnt	phesant	354825	NA	NA	189684	91505	frontal_cortex,H1-hESC,Psoas_Muscle
	23106_irnt	Impedance of whole body	ImpedanceBody	continuous_irnt	phesant	354795	NA	NA	160453	73840	Primary_B_cells_from_peripheral_blood,Fibroblasts,CNCC,esophagus_muscularis_mucosa,ovary,Fetal_Muscle
	23107_irnt	Impedance of leg (right)	ImpedanceRightLeg	continuous_irnt	phesant	354817	NA	NA	142604	61353	esophagus_muscularis_mucosa,Fibroblasts,H1-hESC,CNCC,Primary_B_cells_from_peripheral_blood
	23108_irnt	Impedance of leg (left)	ImpedanceLeftLeg	continuous_irnt	phesant	354811	NA	NA	143858	62784	esophagus_muscularis_mucosa,H1-hESC,CNCC,Primary_B_cells_from_peripheral_blood,Fibroblasts,Pancreas
	23109_irnt	Impedance of arm (right)	ImpedanceRightArm	continuous_irnt	phesant	354792	NA	NA	131338	60056	Fetal_Muscle,Fibroblasts,CNCC,ovary,thyroid_gland,Primary_B_cells_from_peripheral_blood,tibial_nerve,Psoas_Muscle
	23110_irnt	Impedance of arm (left)	ImpedanceLeftArm	continuous_irnt	phesant	354807	NA	NA	130654	58686	ovary,tibial_nerve,Fibroblasts,CNCC,Fetal_Muscle,Primary_B_cells_from_peripheral_blood,frontal_cortex
	23111_irnt	Leg fat percentage (right)	LegFatPercRight	continuous_irnt	phesant	354811	NA	NA	108603	39249	cerebellum,frontal_cortex,Fetal_Renal_Pelvis,esophagus_muscularis_mucosa,Fibroblasts
	23112_irnt	Leg fat mass (right)	LegFatMassRright	continuous_irnt	phesant	354807	NA	NA	116802	44934	frontal_cortex,Fetal_Renal_Pelvis,cerebellum,right_lobe_of_liver,caudate_nucleus,sigmoid_colon
	23113_irnt	Leg fat-free mass (right)	LegFatFreeMassRight	continuous_irnt	phesant	354798	NA	NA	177964	86707	frontal_cortex,H1-hESC,K562,Fetal_Renal_Pelvis
	23115_irnt	Leg fat percentage (left)	LegFatPercLeft	continuous_irnt	phesant	354791	NA	NA	108282	39412	cerebellum,Fetal_Renal_Pelvis,frontal_cortex,right_lobe_of_liver,Ammons_horn
	23116_irnt	Leg fat mass (left)	LegFatMassLeft	continuous_irnt	phesant	354788	NA	NA	118857	45822	frontal_cortex,Fetal_Renal_Pelvis,cerebellum,right_lobe_of_liver,caudate_nucleus,sigmoid_colon
	23117_irnt	Leg fat-free mass (left)	LegFatFreeMassLeft	continuous_irnt	phesant	354771	NA	NA	175779	82392	frontal_cortex,H1-hESC,K562
	23119_irnt	Arm fat percentage (right)	ArmFatPercRright	continuous_irnt	phesant	354760	NA	NA	103331	35944	cerebellum,Fetal_Renal_Pelvis,caudate_nucleus,right_lobe_of_liver,heart_left_ventricle
	23120_irnt	Arm fat mass (right)	ArmFatMassRight	continuous_irnt	phesant	354736	NA	NA	116034	42124	Fetal_Renal_Pelvis,caudate_nucleus,cerebellum,frontal_cortex,right_lobe_of_liver
	23121_irnt	Arm fat-free mass (right)	ArmFatFreeMassRight	continuous_irnt	phesant	354732	NA	NA	171462	81518	frontal_cortex,H1-hESC,Psoas_Muscle
	23123_irnt	Arm fat percentage (left)	ArmFatPercLeft	continuous_irnt	phesant	354707	NA	NA	104867	36836	cerebellum,right_lobe_of_liver,caudate_nucleus,Fetal_Renal_Pelvis
	23124_irnt	Arm fat mass (left)	ArmFatMassLeft	continuous_irnt	phesant	354673	NA	NA	116144	42354	Fetal_Renal_Pelvis,caudate_nucleus,frontal_cortex,right_lobe_of_liver,cerebellum
	23125_irnt	Arm fat-free mass (left)	ArmFatFreeMassLeft	continuous_irnt	phesant	354668	NA	NA	168333	81010	frontal_cortex,H1-hESC,Psoas_Muscle
	23127_irnt	Trunk fat percentage	TrunkFatPerc	continuous_irnt	phesant	354619	NA	NA	105890	35899	Fetal_Renal_Pelvis,cerebellum,frontal_cortex,gastroesophageal_sphincter,thyroid_gland,right_lobe_of_liver
	23128_irnt	Trunk fat mass	TrunkFatMass	continuous_irnt	phesant	354597	NA	NA	122940	46156	Fetal_Renal_Pelvis,frontal_cortex,cerebellum,H1-hESC,right_lobe_of_liver,caudate_nucleus
	23129_irnt	Trunk fat-free mass	TrunkFatFreeMass	continuous_irnt	phesant	354530	NA	NA	196948	102662	frontal_cortex,H1-hESC,esophagus_muscularis_mucosa,Psoas_Muscle,Fibroblasts
Blood	30000_irnt	White blood cell (leukocyte) count	Leukocyte	continuous_irnt	phesant	350470	NA	NA	136363	78436	K562,Primary_Natural_Killer_cells_from_peripheral_blood,Primary_monocytes_from_peripheral_blood,CD4_Primary_Cells,Primary_hematopoietic_stem_cells_G-CSF-mobilized_Female,Fetal_Thymus
	30010_irnt	Red blood cell (erythrocyte) count	Erythrocyte	continuous_irnt	phesant	350475	NA	NA	141300	77625	K562,Fetal_Ovary
	30020_irnt	Haemoglobin concentration	Haemoglobin	continuous_irnt	phesant	350474	NA	NA	120017	71103	K562,Psoas_Muscle
	30030_irnt	Haematocrit percentage	Haematocrit	continuous_irnt	phesant	350475	NA	NA	108415	62885	K562,Fetal_Ovary,frontal_cortex,Psoas_Muscle
	30040_irnt	Mean corpuscular volume	CorpuscularVol	continuous_irnt	phesant	350473	NA	NA	162257	100561	K562
	30050_irnt	Mean corpuscular haemoglobin	CorpuscularHaemo	continuous_irnt	phesant	350472	NA	NA	156168	101360	K562,HeLa-S3
	30060_irnt	Mean corpuscular haemoglobin concentration	CorpuscularHaemoConc	continuous_irnt	phesant	350468	NA	NA	39038	25654	K562,Primary_T_cells_from_cord_blood,cerebellum,transverse_colon,Jurkat,Fetal_Spleen
	30070_irnt	Red blood cell (erythrocyte) distribution width	ErythrocyteDistrWidth	continuous_irnt	phesant	350473	NA	NA	147704	95347	K562
	30080_irnt	Platelet count	Platelet	continuous_irnt	phesant	350474	NA	NA	182413	108440	K562,frontal_cortex,Hematopoietic_multipotent_progenitor_cell
	30090_irnt	Platelet crit	PlateletCrit	continuous_irnt	phesant	350471	NA	NA	149227	84418	K562,frontal_cortex,stomach,Psoas_Muscle,GM12878,Jurkat
	30100_irnt	Mean platelet (thrombocyte) volume	ThrombocyteVol	continuous_irnt	phesant	350470	NA	NA	204863	133986	spleen,upper_lobe_of_left_lung,Primary_hematopoietic_stem_cells_G-CSF-mobilized_Female,Fetal_Intestine_Small,Primary_monocytes_from_peripheral_blood,Jurkat,K562
	30110_irnt	Platelet distribution width	PlateletDistrWidth	continuous_irnt	phesant	350470	NA	NA	145793	86305	Primary_monocytes_from_peripheral_blood,spleen,Primary_hematopoietic_stem_cells_G-CSF-mobilized_Female,frontal_cortex,K562,upper_lobe_of_left_lung
	30120_irnt	Lymphocyte count	Lymphocyte	continuous_irnt	phesant	349856	NA	NA	139947	83150	Primary_Natural_Killer_cells_from_peripheral_blood,CD4_Primary_Cells,Primary_hematopoietic_stem_cells_G-CSF-mobilized_Female,K562,Primary_B_cells_from_peripheral_blood,right_atrium_auricular_region
	30130_irnt	Monocyte count	Monocyte	continuous_irnt	phesant	349856	NA	NA	131031	77741	Primary_monocytes_from_peripheral_blood,CD4_Primary_Cells,Primary_T_cells_from_cord_blood,K562
	30140_irnt	Neutrophill count	Neutrophill	continuous_irnt	phesant	349856	NA	NA	119131	70064	Primary_monocytes_from_peripheral_blood,CD4_Primary_Cells,Primary_T_cells_from_cord_blood,K562,Fetal_Thymus,CD8_Primary_Cells
	30180_irnt	Lymphocyte percentage	LymphocytePerc	continuous_irnt	phesant	349861	NA	NA	99902	56499	Primary_Natural_Killer_cells_from_peripheral_blood,CD4_Primary_Cells,Primary_T_cells_from_cord_blood,Primary_monocytes_from_peripheral_blood,Psoas_Muscle
	30190_irnt	Monocyte percentage	MonocytePerc	continuous_irnt	phesant	349861	NA	NA	111731	63422	Primary_monocytes_from_peripheral_blood,CD4_Primary_Cells,Primary_T_cells_from_cord_blood
	30200_irnt	Neutrophill percentage	NeutrophillPerc	continuous_irnt	phesant	349861	NA	NA	94166	50136	Primary_monocytes_from_peripheral_blood,Primary_T_cells_from_cord_blood,Primary_Natural_Killer_cells_from_peripheral_blood,CD4_Primary_Cells
	30210_irnt	Eosinophill percentage	EosinophillPerc	continuous_irnt	phesant	349861	NA	NA	142335	88409	GM12878,Primary_T_cells_from_cord_blood,Primary_Natural_Killer_cells_from_peripheral_blood
	30220_irnt	Basophill percentage	BasophillPerc	continuous_irnt	phesant	349861	NA	NA	23074	12613	Primary_monocytes_from_peripheral_blood,BJ,Ammons_horn,thoracic_aorta
	30240_irnt	Reticulocyte percentage	ReticulocytePerc	continuous_irnt	phesant	344728	NA	NA	123079	76001	K562,frontal_cortex,Foreskin_Fibroblast_Primary_Cells_skin02
	30250_irnt	Reticulocyte count	Reticulocyte	continuous_irnt	phesant	344729	NA	NA	124148	76751	K562,frontal_cortex,Foreskin_Fibroblast_Primary_Cells_skin02
	30260_irnt	Mean reticulocyte volume	ReticulocyteVol	continuous_irnt	phesant	344728	NA	NA	132170	83198	K562
	30270_irnt	Mean sphered cell volume	SpheredVol	continuous_irnt	phesant	344729	NA	NA	131829	75964	K562
	30280_irnt	Immature reticulocyte fraction	ImmatureReticulocyte	continuous_irnt	phesant	344728	NA	NA	80016	45490	K562,Foreskin_Fibroblast_Primary_Cells_skin02,HeLa-S3,Fetal_Intestine_Large
	30290_irnt	High light scatter reticulocyte percentage	High_light_scatter_ReticulocytePerc	continuous_irnt	phesant	344729	NA	NA	131742	79493	K562,Foreskin_Fibroblast_Primary_Cells_skin02,frontal_cortex,HeLa-S3,Fetal_Intestine_Large
	30300_irnt	High light scatter reticulocyte count	High_light_scatterReticulocyte	continuous_irnt	phesant	344729	NA	NA	132689	79636	K562,frontal_cortex,Foreskin_Fibroblast_Primary_Cells_skin02,Fetal_Intestine_Large,HeLa-S3
	30150	Eosinophill count	Eosinophill	ordinal	phesant	349856	NA	NA	121016	76384	GM12878,Primary_T_cells_from_cord_blood,Primary_Natural_Killer_cells_from_peripheral_blood,spleen,CD4_Primary_Cells
	30160	Basophill count	Basophill	ordinal	phesant	349856	NA	NA	11239	3687	Primary_monocytes_from_peripheral_blood,Primary_T_cells_from_cord_blood,thoracic_aorta,Primary_hematopoietic_stem_cells_G-CSF-mobilized_Female,caudate_nucleus,BJ
	30170	Nucleated red blood cell count	NucleatedRed	ordinal	phesant	349848	NA	NA	1824	820	Ovary
	30230	Nucleated red blood cell percentage	NucleatedRedPerc	ordinal	phesant	349845	NA	NA	1810	784	Ovary
Intaking	1438_irnt	Bread intake	Bread	continuous_irnt	phesant	353030	NA	NA	6852	1350	frontal_cortex,Fetal_Spinal_Cord
	1488_irnt	Tea intake	Tea	continuous_irnt	phesant	349376	NA	NA	10154	3510	H1-hESC
	1289	Cooked vegetable intake	CookedVeget	ordinal	phesant	350404	NA	NA	2693	558	Ammons_horn,heart_left_ventricle,sigmoid_colon
	1299	Salad / raw vegetable intake	Salad	ordinal	phesant	339601	NA	NA	11617	1354	BE2C,Primary_monocytes_from_peripheral_blood,body_of_pancrea,frontal_cortex
	1309	Fresh fruit intake	FreshFruit	ordinal	phesant	348284	NA	NA	11121	3291	frontal_cortex
	1319	Dried fruit intake	DriedFruit	ordinal	phesant	329134	NA	NA	10302	2211	frontal_cortex,caudate_nucleus,heart_left_ventricle,H1-hESC
	1329	Oily fish intake	OilyFish	ordinal	phesant	359340	NA	NA	23476	7331	Primary_T_cells_from_cord_blood
	1349	Processed meat intake	ProcessedMeat	ordinal	phesant	360468	NA	NA	6832	1356	caudate_nucleus,frontal_cortex
	1369	Beef intake	Beef	ordinal	phesant	359784	NA	NA	4099	931	caudate_nucleus
	1379	Lamb/mutton intake	Lamb_Mutton	ordinal	phesant	359002	NA	NA	8647	1367	GM12878,frontal_cortex,Fetal_Renal_Cortex
	1408	Cheese intake	Cheese	ordinal	phesant	352458	NA	NA	12734	2095	putamen
	1458	Cereal intake	Cereal	ordinal	phesant	345019	NA	NA	7525	1431	cerebellum
	1478	Salt added to food	Salt	ordinal	phesant	360954	NA	NA	22538	7149	frontal_cortex
	1498	Coffee intake	Coffee	ordinal	phesant	334659	NA	NA	7799	3148	Ammons_horn,Gastric
	1528	Water intake	Water	ordinal	phesant	333363	NA	NA	8871	1578	frontal_cortex
	1558	Alcohol intake frequency.	AlcoholFreq	ordinal	phesant	360726	NA	NA	24816	8933	frontal_cortex,Ammons_horn
	1568	Average weekly red wine intake	AveRedWine	ordinal	phesant	257773	NA	NA	3708	570	body_of_pancrea,vagina
	5364	Average weekly intake of other alcoholic drinks	AveAlcoholicDrinks	ordinal	phesant	85420	NA	NA	2321	826	BJ,H1_BMP4_Derived_Trophoblast_Cultured_Cells,Fetal_Ovary,Ammons_horn,H1-hESC
	20453	Ever taken cannabis	Cannabis	ordinal	phesant	117911	NA	NA	4115	1025	thoracic_aorta,Ammons_horn,Primary_T_cells_from_cord_blood,Ovary
	100630	Rose wine intake	RoseWine	ordinal	phesant	51427	NA	NA	2266	931	Jurkat
	100720	Fortified wine intake	FortifiedWine	ordinal	phesant	51416	NA	NA	2705	965	Primary_hematopoietic_stem_cells_G-CSF-mobilized_Female,ovary,Fibroblasts,HeLa-S3
	102290	Dark chocolate intake	DarkChocolate	ordinal	phesant	51416	NA	NA	2233	738	frontal_cortex,right_lobe_of_liver,caudate_nucleus
	102330	Sweets intake	Sweets	ordinal	phesant	51427	NA	NA	1856	582	Ammons_horn
	102440	Unsalted nuts intake	UnsaltedNuts	ordinal	phesant	51427	NA	NA	1363	560	Treg_Primary_Cells
	102830	Soft cheese intake	SoftCheese	ordinal	phesant	51427	NA	NA	2020	832	ovary,Foreskin_Fibroblast_Primary_Cells_skin02
	102840	Blue cheese intake	BlueCheese	ordinal	phesant	51422	NA	NA	2075	797	breast_epithelium,ovary,Pancreas,Fetal_Ovary,Fetal_Kidney
	1448_3	Bread type: Wholemeal or wholegrain	Wholemeal_wholegrain	binary	phesant	348424	147411	201013	5913	846	putamen,frontal_cortex,heart_left_ventricle
	1448_1	Bread type: White	WhiteBread	binary	phesant	348424	256972	91452	7947	1244	Foreskin_Fibroblast_Primary_Cells_skin02,heart_left_ventricle,frontal_cortex,putamen
	1448_4	Bread type: Other type of bread	OtherBread	binary	phesant	348424	333983	14441	10585	5644	gastroesophageal_sphincter,caudate_nucleus,HepG2,thoracic_aorta,K562,Primary_T_cells_from_cord_blood
	1468_4	Cereal type: Muesli	MuesliCereal	binary	phesant	299898	238375	61523	4099	735	Fetal_Ovary,Gastric,Psoas_Muscle
	1468_5	Cereal type: Other (e.g. Cornflakes, Frosties)	OtherCereal	binary	phesant	299898	241793	58105	12861	7776	Primary_Natural_Killer_cells_from_peripheral_blood,thoracic_aorta,Fetal_Stomach
	1508_3	Coffee type: Ground coffee (include espresso, filter etc)	GroundCoffee	binary	phesant	283449	218487	64962	7760	1781	cerebellum,frontal_cortex
	1618	Alcohol usually taken with meals	AlcoholWithMeals	binary	phesant	184716	59552	125164	6252	696	Ammons_horn,uterus
Expiratory traits	20116_0	Smoking status: Never	NeverSmoke	binary	phesant	359706	164638	195068	27715	7223	HepG2,putamen
	20116_1	Smoking status: Previous	PreviousSmoke	binary	phesant	359706	232156	127550	8501	2613	HepG2
	20116_2	Smoking status: Current	CurrentSmoke	binary	phesant	359706	322618	37088	5543	1152	stomach,putamen
	20160	Ever smoked	EverSmoked	binary	phesant	359751	141560	218191	16315	4305	HepG2,Fetal_Renal_Pelvis
	3062_irnt	Forced vital capacity (FVC)	FVC	continuous_irnt	phesant	329404	NA	NA	124242	59931	Foreskin_Fibroblast_Primary_Cells_skin02,H7-hESC,gastroesophageal_sphincter,Psoas_Muscle,Fetal_Lung,Panc1
	3063_irnt	Forced expiratory volume in 1-second (FEV1)	FVC1	continuous_irnt	phesant	329404	NA	NA	106239	47640	H7-hESC,Foreskin_Fibroblast_Primary_Cells_skin02,thoracic_aorta,Fetal_Lung,gastroesophageal_sphincter
	3064_irnt	Peak expiratory flow (PEF)	PEF	continuous_irnt	phesant	329404	NA	NA	48118	20673	H7-hESC,Fetal_Stomach,Fetal_Lung,Foreskin_Fibroblast_Primary_Cells_skin02,Psoas_Muscle
Bone	3143_irnt	Ankle spacing width	AnkleSpacingWidth	continuous_irnt	phesant	206589	NA	NA	92381	44246	Foreskin_Fibroblast_Primary_Cells_skin02,H1-hESC,Psoas_Muscle,frontal_cortex
	3144_irnt	Heel Broadband ultrasound attenuation, direct entry	HeelBroadband	continuous_irnt	phesant	206576	NA	NA	88206	49962	sigmoid_colon,tibial_nerve,GM12878,HepG2,HeLa-S3
	3147_irnt	Heel quantitative ultrasound index (QUI), direct entry	QUI	continuous_irnt	phesant	206589	NA	NA	97392	55974	sigmoid_colon,tibial_nerve,GM12878,HepG2,Panc1,Fetal_Muscle,HeLa-S3
	3148_irnt	Heel bone mineral density (BMD)	BMD	continuous_irnt	phesant	206496	NA	NA	98003	56349	sigmoid_colon,tibial_nerve,GM12878,HepG2,HeLa-S3,Fetal_Muscle

## Sheet: Supplementary file 1e
Supplementary file 1e. Relevance correlation and the top 3 common relevant tcontexts of UKBB phnotypes
Trait1	Trait2	Relevance correlation	Top 3 common relevant contexts
I9_CHD_NOREV	I9_CHD	1	Primary_B_cells_from_peripheral_blood,Fetal_Intestine_Large,MCF-7
2247_0	2247_1	0.998265	Melanocyte,H7-hESC,lower_leg_skin
23101_irnt	23102_irnt	0.998239	frontal_cortex,H1-hESC,esophagus_muscularis_mucosa
3147_irnt	3148_irnt	0.997634	sigmoid_colon,tibial_nerve,GM12878
23113_irnt	23117_irnt	0.993454	frontal_cortex,H1-hESC,K562
23120_irnt	23124_irnt	0.992245	Fetal_Renal_Pelvis,caudate_nucleus,frontal_cortex
23102_irnt	23105_irnt	0.990431	frontal_cortex,H1-hESC,Psoas_Muscle
23101_irnt	23105_irnt	0.990352	frontal_cortex,H1-hESC,Psoas_Muscle
30290_irnt	30300_irnt	0.989668	K562,Foreskin_Fibroblast_Primary_Cells_skin02,frontal_cortex
23112_irnt	23116_irnt	0.989379	frontal_cortex,Fetal_Renal_Pelvis,cerebellum
23101_irnt	23129_irnt	0.986698	frontal_cortex,H1-hESC,esophagus_muscularis_mucosa
23102_irnt	23129_irnt	0.985593	frontal_cortex,H1-hESC,esophagus_muscularis_mucosa
23119_irnt	23123_irnt	0.9847	cerebellum,caudate_nucleus,Fetal_Renal_Pelvis
23121_irnt	23125_irnt	0.982991	frontal_cortex,H1-hESC,Psoas_Muscle
23102_irnt	23121_irnt	0.98236	frontal_cortex,H1-hESC,esophagus_muscularis_mucosa
23101_irnt	23121_irnt	0.980888	frontal_cortex,H1-hESC,esophagus_muscularis_mucosa
23099_irnt	23127_irnt	0.977417	Fetal_Renal_Pelvis,cerebellum,frontal_cortex
23105_irnt	23117_irnt	0.977365	frontal_cortex,H1-hESC,K562
23107_irnt	23108_irnt	0.976997	esophagus_muscularis_mucosa,H1-hESC,CNCC
23105_irnt	23121_irnt	0.975945	frontal_cortex,H1-hESC,Psoas_Muscle
23105_irnt	23125_irnt	0.974762	frontal_cortex,H1-hESC,Psoas_Muscle
23100_irnt	23116_irnt	0.974683	Fetal_Renal_Pelvis,frontal_cortex,cerebellum
23121_irnt	23129_irnt	0.974657	frontal_cortex,H1-hESC,esophagus_muscularis_mucosa
23100_irnt	23128_irnt	0.974604	Fetal_Renal_Pelvis,frontal_cortex,cerebellum
6150_4	20002_1065	0.974447	CNCC,adrenal_gland,Fetal_Spleen
I9_CORATHER	I25	0.974394	Fetal_Ovary,gastroesophageal_sphincter,prostate_gland
23105_irnt	23113_irnt	0.973553	frontal_cortex,H1-hESC,K562
23102_irnt	23125_irnt	0.97187	frontal_cortex,H1-hESC,esophagus_muscularis_mucosa
23101_irnt	23125_irnt	0.971134	frontal_cortex,H1-hESC,esophagus_muscularis_mucosa
23111_irnt	23115_irnt	0.971003	cerebellum,Fetal_Renal_Pelvis,frontal_cortex
30240_irnt	30250_irnt	0.970608	K562,frontal_cortex,Foreskin_Fibroblast_Primary_Cells_skin02
23109_irnt	23110_irnt	0.968032	Fibroblasts,ovary,Fetal_Muscle
23100_irnt	23112_irnt	0.967585	Fetal_Renal_Pelvis,frontal_cortex,cerebellum
23105_irnt	23129_irnt	0.965482	frontal_cortex,H1-hESC,Psoas_Muscle
30210_irnt	30150	0.963615	GM12878,Primary_T_cells_from_cord_blood,Primary_Natural_Killer_cells_from_peripheral_blood
23125_irnt	23129_irnt	0.963168	frontal_cortex,H1-hESC,esophagus_muscularis_mucosa
23101_irnt	23117_irnt	0.960566	frontal_cortex,H1-hESC,esophagus_muscularis_mucosa
23101_irnt	23113_irnt	0.959672	frontal_cortex,H1-hESC,esophagus_muscularis_mucosa
23102_irnt	23117_irnt	0.959146	frontal_cortex,H1-hESC,esophagus_muscularis_mucosa
30040_irnt	30050_irnt	0.958936	K562,HeLa-S3,Ammons_horn
23102_irnt	23113_irnt	0.957805	frontal_cortex,H1-hESC,esophagus_muscularis_mucosa
23100_irnt	23124_irnt	0.954151	Fetal_Renal_Pelvis,frontal_cortex,caudate_nucleus
3144_irnt	3148_irnt	0.953836	sigmoid_colon,tibial_nerve,GM12878
23100_irnt	23120_irnt	0.953468	Fetal_Renal_Pelvis,caudate_nucleus,cerebellum
30020_irnt	30030_irnt	0.952469	K562,frontal_cortex,Psoas_Muscle
3144_irnt	3147_irnt	0.951706	sigmoid_colon,tibial_nerve,GM12878
30170	30230	0.949314	Ovary,Psoas_Muscle,stomach
30240_irnt	30300_irnt	0.942873	K562,frontal_cortex,Foreskin_Fibroblast_Primary_Cells_skin02
23116_irnt	23124_irnt	0.941874	Fetal_Renal_Pelvis,frontal_cortex,caudate_nucleus
21001_irnt	23120_irnt	0.938929	cerebellum,caudate_nucleus,Fetal_Renal_Pelvis
23099_irnt	23123_irnt	0.93751	cerebellum,Fetal_Renal_Pelvis,right_lobe_of_liver
21001_irnt	23124_irnt	0.937221	caudate_nucleus,frontal_cortex,cerebellum
23116_irnt	23120_irnt	0.937063	Fetal_Renal_Pelvis,frontal_cortex,cerebellum
30240_irnt	30290_irnt	0.936485	K562,Foreskin_Fibroblast_Primary_Cells_skin02,frontal_cortex
23117_irnt	23121_irnt	0.934855	frontal_cortex,H1-hESC,esophagus_muscularis_mucosa
23112_irnt	23124_irnt	0.932962	Fetal_Renal_Pelvis,frontal_cortex,caudate_nucleus
23112_irnt	23120_irnt	0.930885	Fetal_Renal_Pelvis,frontal_cortex,cerebellum
30250_irnt	30300_irnt	0.929413	K562,frontal_cortex,Foreskin_Fibroblast_Primary_Cells_skin02
23117_irnt	23125_irnt	0.929281	frontal_cortex,H1-hESC,esophagus_muscularis_mucosa
23113_irnt	23121_irnt	0.927993	frontal_cortex,H1-hESC,esophagus_muscularis_mucosa
23116_irnt	23128_irnt	0.925916	Fetal_Renal_Pelvis,frontal_cortex,cerebellum
23099_irnt	23119_irnt	0.92518	cerebellum,Fetal_Renal_Pelvis,right_lobe_of_liver
23099_irnt	23115_irnt	0.923103	cerebellum,Fetal_Renal_Pelvis,frontal_cortex
C3_SKIN	C3_OTHER_SKIN	0.918923	HeLa-S3,Jurkat,GM12878
23113_irnt	23125_irnt	0.917451	frontal_cortex,H1-hESC,esophagus_muscularis_mucosa
23127_irnt	23128_irnt	0.917451	Fetal_Renal_Pelvis,cerebellum,frontal_cortex
23117_irnt	23129_irnt	0.916583	frontal_cortex,H1-hESC,esophagus_muscularis_mucosa
23113_irnt	23129_irnt	0.916347	frontal_cortex,H1-hESC,esophagus_muscularis_mucosa
23112_irnt	23128_irnt	0.914927	Fetal_Renal_Pelvis,frontal_cortex,cerebellum
23123_irnt	23127_irnt	0.91193	cerebellum,Fetal_Renal_Pelvis,right_lobe_of_liver
21002_irnt	23117_irnt	0.910826	frontal_cortex,H1-hESC,Fetal_Renal_Pelvis
23124_irnt	23128_irnt	0.908697	Fetal_Renal_Pelvis,frontal_cortex,caudate_nucleus
23099_irnt	23128_irnt	0.908355	Fetal_Renal_Pelvis,cerebellum,frontal_cortex
23120_irnt	23128_irnt	0.908039	Fetal_Renal_Pelvis,cerebellum,frontal_cortex
30180_irnt	30200_irnt	0.907724	Primary_Natural_Killer_cells_from_peripheral_blood,Primary_monocytes_from_peripheral_blood,Primary_T_cells_from_cord_blood
23123_irnt	23128_irnt	0.907093	cerebellum,Fetal_Renal_Pelvis,right_lobe_of_liver
21001_irnt	23116_irnt	0.905384	frontal_cortex,cerebellum,Fetal_Renal_Pelvis
23106_irnt	23108_irnt	0.905358	esophagus_muscularis_mucosa,Primary_B_cells_from_peripheral_blood,CNCC
30000_irnt	30140_irnt	0.904254	Primary_monocytes_from_peripheral_blood,K562,CD4_Primary_Cells
23100_irnt	23123_irnt	0.900415	cerebellum,Fetal_Renal_Pelvis,caudate_nucleus
23099_irnt	23111_irnt	0.900152	cerebellum,Fetal_Renal_Pelvis,frontal_cortex
3062_irnt	3063_irnt	0.9001	Foreskin_Fibroblast_Primary_Cells_skin02,H7-hESC,gastroesophageal_sphincter
23119_irnt	23120_irnt	0.900021	Fetal_Renal_Pelvis,cerebellum,caudate_nucleus
23120_irnt	23123_irnt	0.898943	cerebellum,caudate_nucleus,Fetal_Renal_Pelvis
23115_irnt	23116_irnt	0.898654	cerebellum,Fetal_Renal_Pelvis,frontal_cortex
30250_irnt	30290_irnt	0.897182	K562,Foreskin_Fibroblast_Primary_Cells_skin02,frontal_cortex
21001_irnt	23112_irnt	0.89663	frontal_cortex,cerebellum,Fetal_Renal_Pelvis
23112_irnt	23115_irnt	0.896472	cerebellum,Fetal_Renal_Pelvis,frontal_cortex
23106_irnt	23107_irnt	0.895578	Fibroblasts,esophagus_muscularis_mucosa,Primary_B_cells_from_peripheral_blood
21002_irnt	23105_irnt	0.893449	frontal_cortex,H1-hESC,Fetal_Renal_Pelvis
23123_irnt	23124_irnt	0.892029	caudate_nucleus,Fetal_Renal_Pelvis,cerebellum
23099_irnt	23100_irnt	0.891188	Fetal_Renal_Pelvis,cerebellum,frontal_cortex
23119_irnt	23127_irnt	0.888848	cerebellum,Fetal_Renal_Pelvis,right_lobe_of_liver
21002_irnt	23113_irnt	0.888664	frontal_cortex,H1-hESC,Fetal_Renal_Pelvis
49_irnt	21002_irnt	0.888585	Fetal_Renal_Pelvis,frontal_cortex,H1-hESC
23106_irnt	23110_irnt	0.885167	Fibroblasts,ovary,CNCC
48_irnt	23100_irnt	0.884142	Fetal_Renal_Pelvis,cerebellum,frontal_cortex
23119_irnt	23124_irnt	0.884011	Fetal_Renal_Pelvis,caudate_nucleus,cerebellum
48_irnt	23112_irnt	0.881618	Fetal_Renal_Pelvis,frontal_cortex,cerebellum
48_irnt	23116_irnt	0.881198	Fetal_Renal_Pelvis,frontal_cortex,cerebellum
23100_irnt	23119_irnt	0.880777	Fetal_Renal_Pelvis,cerebellum,caudate_nucleus
23119_irnt	23128_irnt	0.878884	Fetal_Renal_Pelvis,cerebellum,caudate_nucleus
23111_irnt	23112_irnt	0.878174	frontal_cortex,cerebellum,Fetal_Renal_Pelvis
23106_irnt	23109_irnt	0.876702	Fibroblasts,CNCC,Fetal_Muscle
21001_irnt	23100_irnt	0.872733	cerebellum,frontal_cortex,Fetal_Renal_Pelvis
30260_irnt	30270_irnt	0.871944	K562,HeLa-S3,frontal_cortex
23100_irnt	23115_irnt	0.87176	Fetal_Renal_Pelvis,cerebellum,frontal_cortex
30080_irnt	30090_irnt	0.870892	K562,frontal_cortex,Hematopoietic_multipotent_progenitor_cell
48_irnt	23124_irnt	0.870761	Fetal_Renal_Pelvis,frontal_cortex,cerebellum
21002_irnt	23124_irnt	0.869578	Fetal_Renal_Pelvis,frontal_cortex,cerebellum
21002_irnt	23125_irnt	0.869315	frontal_cortex,H1-hESC,Psoas_Muscle
23099_irnt	23116_irnt	0.868211	Fetal_Renal_Pelvis,frontal_cortex,cerebellum
23115_irnt	23119_irnt	0.868158	cerebellum,Fetal_Renal_Pelvis,right_lobe_of_liver
23116_irnt	23123_irnt	0.868	cerebellum,Fetal_Renal_Pelvis,right_lobe_of_liver
I9_CORATHER	I9_IHD	0.865424	gastroesophageal_sphincter,Primary_B_cells_from_peripheral_blood,Fetal_Intestine_Large
23115_irnt	23123_irnt	0.865424	cerebellum,Fetal_Renal_Pelvis,right_lobe_of_liver
23100_irnt	23127_irnt	0.864504	Fetal_Renal_Pelvis,cerebellum,frontal_cortex
1717	1727	0.86411	Melanocyte,GM12878,Gastric
5264_irnt	5265_irnt	0.861323	frontal_cortex,uterus,Foreskin_Fibroblast_Primary_Cells_skin02
23115_irnt	23127_irnt	0.859982	cerebellum,Fetal_Renal_Pelvis,frontal_cortex
48_irnt	23120_irnt	0.859903	Fetal_Renal_Pelvis,cerebellum,frontal_cortex
21002_irnt	23120_irnt	0.859325	Fetal_Renal_Pelvis,frontal_cortex,cerebellum
23111_irnt	23116_irnt	0.859141	frontal_cortex,cerebellum,Fetal_Renal_Pelvis
5257_irnt	5265_irnt	0.856564	frontal_cortex,Foreskin_Fibroblast_Primary_Cells_skin02,tibial_nerve
23111_irnt	23119_irnt	0.855881	cerebellum,Fetal_Renal_Pelvis,right_lobe_of_liver
23099_irnt	23112_irnt	0.85504	Fetal_Renal_Pelvis,frontal_cortex,cerebellum
23116_irnt	23119_irnt	0.853436	cerebellum,Fetal_Renal_Pelvis,caudate_nucleus
21002_irnt	23100_irnt	0.853278	Fetal_Renal_Pelvis,frontal_cortex,cerebellum
23112_irnt	23123_irnt	0.852937	cerebellum,Fetal_Renal_Pelvis,right_lobe_of_liver
23111_irnt	23123_irnt	0.844682	cerebellum,Fetal_Renal_Pelvis,frontal_cortex
21002_irnt	23121_irnt	0.844156	frontal_cortex,H1-hESC,Psoas_Muscle
5256_irnt	5257_irnt	0.843735	gastroesophageal_sphincter,frontal_cortex,tibial_nerve
23112_irnt	23119_irnt	0.843157	cerebellum,Fetal_Renal_Pelvis,caudate_nucleus
48_irnt	23128_irnt	0.842684	Fetal_Renal_Pelvis,cerebellum,frontal_cortex
23115_irnt	23128_irnt	0.842421	Fetal_Renal_Pelvis,cerebellum,frontal_cortex
30130_irnt	30190_irnt	0.840344	Primary_monocytes_from_peripheral_blood,CD4_Primary_Cells,Primary_T_cells_from_cord_blood
21002_irnt	23101_irnt	0.838845	frontal_cortex,H1-hESC,K562
21002_irnt	23102_irnt	0.838109	frontal_cortex,H1-hESC,K562
23100_irnt	23111_irnt	0.835533	cerebellum,Fetal_Renal_Pelvis,frontal_cortex
21002_irnt	23116_irnt	0.834902	frontal_cortex,Fetal_Renal_Pelvis,cerebellum
I25	I9_IHD	0.834665	gastroesophageal_sphincter,Foreskin_Fibroblast_Primary_Cells_skin02,Primary_B_cells_from_peripheral_blood
21001_irnt	23119_irnt	0.833798	cerebellum,caudate_nucleus,Fetal_Renal_Pelvis
23111_irnt	23127_irnt	0.832799	cerebellum,Fetal_Renal_Pelvis,frontal_cortex
5256_irnt	5264_irnt	0.831537	frontal_cortex,gastroesophageal_sphincter,thyroid_gland
50_irnt	1697	0.829276	H1-hESC,upper_lobe_of_left_lung,frontal_cortex
21001_irnt	23123_irnt	0.828146	cerebellum,caudate_nucleus,right_lobe_of_liver
21002_irnt	23112_irnt	0.826752	frontal_cortex,Fetal_Renal_Pelvis,cerebellum
46_irnt	47_irnt	0.824491	frontal_cortex,gastrocnemius_medialis,H1-hESC
23115_irnt	23120_irnt	0.823992	Fetal_Renal_Pelvis,cerebellum,frontal_cortex
K80	K11_GALLBILPANC	0.822178	gastroesophageal_sphincter,frontal_cortex,HepG2
1747_1	1747_4	0.8211	Melanocyte,lower_leg_skin,GM12878
23099_irnt	23120_irnt	0.819339	Fetal_Renal_Pelvis,cerebellum,frontal_cortex
23116_irnt	23127_irnt	0.817262	Fetal_Renal_Pelvis,frontal_cortex,cerebellum
49_irnt	23124_irnt	0.816552	Fetal_Renal_Pelvis,frontal_cortex,cerebellum
5255_irnt	5263_irnt	0.815527	tibial_nerve,CNCC,Fibroblasts
23115_irnt	23124_irnt	0.8109	Fetal_Renal_Pelvis,cerebellum,frontal_cortex
48_irnt	21001_irnt	0.810663	cerebellum,frontal_cortex,Fetal_Renal_Pelvis
21002_irnt	23128_irnt	0.80927	Fetal_Renal_Pelvis,frontal_cortex,cerebellum
30280_irnt	30290_irnt	0.809191	K562,Foreskin_Fibroblast_Primary_Cells_skin02,HeLa-S3
23111_irnt	23128_irnt	0.808612	cerebellum,Fetal_Renal_Pelvis,frontal_cortex
21001_irnt	23128_irnt	0.808271	cerebellum,frontal_cortex,Fetal_Renal_Pelvis
49_irnt	23120_irnt	0.807587	Fetal_Renal_Pelvis,frontal_cortex,cerebellum
48_irnt	23123_irnt	0.806904	cerebellum,Fetal_Renal_Pelvis,right_lobe_of_liver
23099_irnt	23124_irnt	0.80601	Fetal_Renal_Pelvis,frontal_cortex,cerebellum
20015_irnt	50_irnt	0.803565	Hematopoietic_multipotent_progenitor_cell,K562,H7-hESC
49_irnt	23100_irnt	0.802855	Fetal_Renal_Pelvis,frontal_cortex,cerebellum
21001_irnt	23115_irnt	0.801856	cerebellum,frontal_cortex,Fetal_Renal_Pelvis
49_irnt	23116_irnt	0.801514	Fetal_Renal_Pelvis,frontal_cortex,cerebellum
49_irnt	23112_irnt	0.80112	Fetal_Renal_Pelvis,frontal_cortex,cerebellum
23112_irnt	23127_irnt	0.801015	Fetal_Renal_Pelvis,frontal_cortex,cerebellum
48_irnt	23115_irnt	0.800174	cerebellum,Fetal_Renal_Pelvis,frontal_cortex
21001_irnt	21002_irnt	0.799832	frontal_cortex,cerebellum,Fetal_Renal_Pelvis
49_irnt	23117_irnt	0.798701	frontal_cortex,Fetal_Renal_Pelvis,H1-hESC
30120_irnt	30180_irnt	0.794942	Primary_Natural_Killer_cells_from_peripheral_blood,CD4_Primary_Cells,Primary_hematopoietic_stem_cells_G-CSF-mobilized_Female
30280_irnt	30300_irnt	0.792786	K562,Foreskin_Fibroblast_Primary_Cells_skin02,Fetal_Intestine_Large
23111_irnt	23120_irnt	0.792655	cerebellum,Fetal_Renal_Pelvis,frontal_cortex
2395_1	2395_4	0.792287	CNCC,Fetal_Ovary,uterus
30140_irnt	30200_irnt	0.786135	Primary_monocytes_from_peripheral_blood,Primary_T_cells_from_cord_blood,CD4_Primary_Cells
21002_irnt	23129_irnt	0.782297	frontal_cortex,H1-hESC,Psoas_Muscle
102_irnt	4194_irnt	0.782139	heart_left_ventricle,putamen,Fetal_Heart
20116_0	20116_1	0.780351	HepG2,putamen,cerebellum
49_irnt	23105_irnt	0.777381	frontal_cortex,H1-hESC,Fetal_Renal_Pelvis
23111_irnt	23124_irnt	0.777144	Fetal_Renal_Pelvis,frontal_cortex,cerebellum
48_irnt	21002_irnt	0.776592	Fetal_Renal_Pelvis,frontal_cortex,cerebellum
49_irnt	23125_irnt	0.775882	frontal_cortex,H1-hESC,esophagus_muscularis_mucosa
23120_irnt	23127_irnt	0.775724	Fetal_Renal_Pelvis,cerebellum,frontal_cortex
49_irnt	23113_irnt	0.772254	frontal_cortex,Fetal_Renal_Pelvis,H1-hESC
30000_irnt	30200_irnt	0.771018	Primary_monocytes_from_peripheral_blood,Primary_Natural_Killer_cells_from_peripheral_blood,CD4_Primary_Cells
48_irnt	23119_irnt	0.770151	cerebellum,Fetal_Renal_Pelvis,right_lobe_of_liver
49_irnt	23128_irnt	0.769257	Fetal_Renal_Pelvis,frontal_cortex,H1-hESC
48_irnt	23111_irnt	0.768363	cerebellum,Fetal_Renal_Pelvis,frontal_cortex
5256_irnt	5265_irnt	0.767022	frontal_cortex,Foreskin_Fibroblast_Primary_Cells_skin02,gastroesophageal_sphincter
48_irnt	23099_irnt	0.766076	Fetal_Renal_Pelvis,cerebellum,frontal_cortex
23124_irnt	23127_irnt	0.765077	Fetal_Renal_Pelvis,frontal_cortex,cerebellum
21001_irnt	23111_irnt	0.763973	cerebellum,frontal_cortex,Fetal_Renal_Pelvis
48_irnt	49_irnt	0.761028	Fetal_Renal_Pelvis,frontal_cortex,H1-hESC
30000_irnt	30180_irnt	0.759004	Primary_Natural_Killer_cells_from_peripheral_blood,CD4_Primary_Cells,Primary_monocytes_from_peripheral_blood
6150_4	6153_2	0.752011	CNCC,adrenal_gland,Fetal_Spleen
49_irnt	21001_irnt	0.750881	frontal_cortex,Fetal_Renal_Pelvis,cerebellum
20116_0	20160	0.748594	HepG2,body_of_pancrea,putamen
H26	H7_LENS	0.747673	CNCC,BJ,right_lobe_of_liver
1747_3	1747_4	0.745886	Melanocyte,GM12878,tibial_nerve
21001_irnt	23099_irnt	0.74352	cerebellum,frontal_cortex,Fetal_Renal_Pelvis
1697	23129_irnt	0.742626	frontal_cortex,esophagus_muscularis_mucosa,H1-hESC
1747_4	1747_5	0.741311	Melanocyte,GM12878,lower_leg_skin
1747_1	1747_5	0.738157	Melanocyte,esophagus_muscularis_mucosa,GM12878
49_irnt	23121_irnt	0.73679	frontal_cortex,H1-hESC,esophagus_muscularis_mucosa
5257_irnt	5264_irnt	0.73629	frontal_cortex,gastroesophageal_sphincter,uterus
5255_irnt	5257_irnt	0.735948	tibial_nerve,CNCC,gastroesophageal_sphincter
30000_irnt	30120_irnt	0.734949	Primary_Natural_Killer_cells_from_peripheral_blood,K562,CD4_Primary_Cells
20015_irnt	1697	0.727457	Fibroblasts,Psoas_Muscle,Foreskin_Keratinocyte_Primary_Cells_skin02
49_irnt	23102_irnt	0.726957	frontal_cortex,H1-hESC,esophagus_muscularis_mucosa
49_irnt	23101_irnt	0.726589	frontal_cortex,H1-hESC,esophagus_muscularis_mucosa
48_irnt	23127_irnt	0.724381	Fetal_Renal_Pelvis,cerebellum,frontal_cortex
20002_1065	6153_2	0.720963	CNCC,adrenal_gland,Fetal_Spleen
30040_irnt	30270_irnt	0.714654	K562,HeLa-S3,Primary_T_cells_from_cord_blood
30120_irnt	30200_irnt	0.712603	Primary_Natural_Killer_cells_from_peripheral_blood,CD4_Primary_Cells,Primary_monocytes_from_peripheral_blood
1697	23101_irnt	0.712445	frontal_cortex,esophagus_muscularis_mucosa,H1-hESC
1697	23102_irnt	0.704979	frontal_cortex,esophagus_muscularis_mucosa,H1-hESC
30140_irnt	30180_irnt	0.698538	CD4_Primary_Cells,Primary_monocytes_from_peripheral_blood,Primary_T_cells_from_cord_blood
23108_irnt	23110_irnt	0.698065	CNCC,Fibroblasts,Primary_B_cells_from_peripheral_blood
1448_3	1448_1	0.697986	frontal_cortex,heart_left_ventricle,putamen
23117_irnt	23120_irnt	0.697881	Fetal_Renal_Pelvis,frontal_cortex,H1-hESC
23117_irnt	23124_irnt	0.696829	frontal_cortex,Fetal_Renal_Pelvis,H1-hESC
30080_irnt	30100_irnt	0.695436	upper_lobe_of_left_lung,K562,frontal_cortex
30050_irnt	30270_irnt	0.694963	K562,HeLa-S3,Primary_T_cells_from_cord_blood
3063_irnt	3064_irnt	0.691204	H7-hESC,Foreskin_Fibroblast_Primary_Cells_skin02,Fetal_Lung
23108_irnt	23109_irnt	0.690126	CNCC,Fibroblasts,Primary_B_cells_from_peripheral_blood
30220_irnt	30160	0.688864	Primary_monocytes_from_peripheral_blood,thoracic_aorta,BJ
23107_irnt	23110_irnt	0.684605	Fibroblasts,CNCC,tibial_nerve
23107_irnt	23117_irnt	0.684447	H1-hESC,esophagus_muscularis_mucosa,Fibroblasts
21001_irnt	23127_irnt	0.683948	cerebellum,frontal_cortex,Fetal_Renal_Pelvis
23107_irnt	23109_irnt	0.683606	Fibroblasts,CNCC,Primary_B_cells_from_peripheral_blood
1697	23121_irnt	0.683054	frontal_cortex,esophagus_muscularis_mucosa,H1-hESC
23107_irnt	23113_irnt	0.680293	H1-hESC,esophagus_muscularis_mucosa,Fibroblasts
5255_irnt	5265_irnt	0.677927	frontal_cortex,CNCC,tibial_nerve
K40	K11_HERNIA	0.676718	gastroesophageal_sphincter,ovary,sigmoid_colon
49_irnt	23129_irnt	0.67656	frontal_cortex,H1-hESC,esophagus_muscularis_mucosa
21002_irnt	23123_irnt	0.675614	cerebellum,Fetal_Renal_Pelvis,frontal_cortex
1697	23105_irnt	0.674221	frontal_cortex,H1-hESC,Psoas_Muscle
1747_3	1747_5	0.674063	GM12878,Melanocyte,lower_leg_skin
30040_irnt	30260_irnt	0.673037	K562,HeLa-S3,Primary_T_cells_from_cord_blood
23100_irnt	23117_irnt	0.671539	frontal_cortex,Fetal_Renal_Pelvis,H1-hESC
50_irnt	23129_irnt	0.671171	H1-hESC,Hematopoietic_multipotent_progenitor_cell,frontal_cortex
1747_3	1747_1	0.670671	Melanocyte,GM12878,lower_leg_skin
23113_irnt	23120_irnt	0.668384	Fetal_Renal_Pelvis,frontal_cortex,H1-hESC
23113_irnt	23124_irnt	0.6682	frontal_cortex,Fetal_Renal_Pelvis,H1-hESC
49_irnt	23123_irnt	0.662601	Fetal_Renal_Pelvis,cerebellum,frontal_cortex
21001_irnt	23106_irnt	0.661759	Fibroblasts,frontal_cortex,H1-hESC
23108_irnt	23117_irnt	0.659814	H1-hESC,esophagus_muscularis_mucosa,Melanocyte
21002_irnt	23119_irnt	0.659288	Fetal_Renal_Pelvis,cerebellum,frontal_cortex
5254_irnt	5262_irnt	0.656291	gastroesophageal_sphincter,tibial_nerve,Fibroblasts
30120_irnt	30150	0.656212	Primary_Natural_Killer_cells_from_peripheral_blood,CD4_Primary_Cells,Fetal_Thymus
5257_irnt	5263_irnt	0.655424	tibial_nerve,gastroesophageal_sphincter,CNCC
30130_irnt	30200_irnt	0.655318	Primary_monocytes_from_peripheral_blood,Primary_T_cells_from_cord_blood,CD4_Primary_Cells
30180_irnt	30150	0.654162	Primary_Natural_Killer_cells_from_peripheral_blood,Primary_T_cells_from_cord_blood,CD4_Primary_Cells
1697	23125_irnt	0.65403	frontal_cortex,esophagus_muscularis_mucosa,H1-hESC
21002_irnt	23115_irnt	0.653636	Fetal_Renal_Pelvis,frontal_cortex,cerebellum
6138_1	6138_2	0.652058	Ammons_horn,frontal_cortex,cerebellum
23105_irnt	23107_irnt	0.650902	H1-hESC,esophagus_muscularis_mucosa,Fibroblasts
30190_irnt	30200_irnt	0.650902	Primary_monocytes_from_peripheral_blood,Primary_T_cells_from_cord_blood,CD4_Primary_Cells
30050_irnt	30260_irnt	0.650586	K562,HeLa-S3,Primary_T_cells_from_cord_blood
23116_irnt	23117_irnt	0.649771	frontal_cortex,Fetal_Renal_Pelvis,H1-hESC
23105_irnt	23124_irnt	0.648667	frontal_cortex,Fetal_Renal_Pelvis,H1-hESC
23105_irnt	23120_irnt	0.648194	frontal_cortex,Fetal_Renal_Pelvis,H1-hESC
23101_irnt	23107_irnt	0.648089	esophagus_muscularis_mucosa,H1-hESC,Fibroblasts
1697	23113_irnt	0.647826	frontal_cortex,H1-hESC,esophagus_muscularis_mucosa
23108_irnt	23113_irnt	0.647221	H1-hESC,esophagus_muscularis_mucosa,Fibroblasts
30120_irnt	30210_irnt	0.647195	Primary_Natural_Killer_cells_from_peripheral_blood,CD4_Primary_Cells,Primary_B_cells_from_peripheral_blood
5254_irnt	5255_irnt	0.646695	gastroesophageal_sphincter,tibial_nerve,Fibroblasts
49_irnt	23115_irnt	0.64659	Fetal_Renal_Pelvis,frontal_cortex,cerebellum
1717	1747_4	0.646248	Melanocyte,GM12878,Panc1
2754_irnt	2764_irnt	0.645092	frontal_cortex,heart_left_ventricle,cerebellum
30240_irnt	30280_irnt	0.645065	K562,Foreskin_Fibroblast_Primary_Cells_skin02,HeLa-S3
30180_irnt	30210_irnt	0.644408	Primary_Natural_Killer_cells_from_peripheral_blood,Primary_T_cells_from_cord_blood,CD4_Primary_Cells
23102_irnt	23107_irnt	0.643935	esophagus_muscularis_mucosa,H1-hESC,Fibroblasts
6152_8	30210_irnt	0.643646	Primary_T_cells_from_cord_blood,GM12878,Primary_Natural_Killer_cells_from_peripheral_blood
23112_irnt	23117_irnt	0.64333	frontal_cortex,Fetal_Renal_Pelvis,H1-hESC
6152_8	6152_9	0.641674	Primary_T_cells_from_cord_blood,Primary_Natural_Killer_cells_from_peripheral_blood,Fetal_Stomach
21001_irnt	23117_irnt	0.641201	frontal_cortex,H1-hESC,Fetal_Renal_Pelvis
20002_1473	6177_1	0.640307	H1-hESC,right_lobe_of_liver,H7-hESC
1697	23117_irnt	0.639992	frontal_cortex,H1-hESC,esophagus_muscularis_mucosa
23106_irnt	23125_irnt	0.639624	Fibroblasts,esophagus_muscularis_mucosa,H1-hESC
23100_irnt	23113_irnt	0.639019	frontal_cortex,Fetal_Renal_Pelvis,H1-hESC
30080_irnt	30110_irnt	0.638309	frontal_cortex,K562,upper_lobe_of_left_lung
21001_irnt	23107_irnt	0.637994	H1-hESC,cerebellum,esophagus_muscularis_mucosa
5262_irnt	5263_irnt	0.63752	gastroesophageal_sphincter,tibial_nerve,CNCC
20127_irnt	1960	0.636995	heart_left_ventricle,Primary_B_cells_from_peripheral_blood,BE2C
23112_irnt	23125_irnt	0.63589	frontal_cortex,Fetal_Renal_Pelvis,Fibroblasts
49_irnt	23119_irnt	0.635259	Fetal_Renal_Pelvis,cerebellum,frontal_cortex
50_irnt	23101_irnt	0.634339	H1-hESC,K562,Hematopoietic_multipotent_progenitor_cell
5263_irnt	5265_irnt	0.634103	tibial_nerve,CNCC,frontal_cortex
30010_irnt	30040_irnt	0.632788	K562,upper_lobe_of_left_lung,Ammons_horn
23117_irnt	23128_irnt	0.632762	frontal_cortex,Fetal_Renal_Pelvis,H1-hESC
23100_irnt	23105_irnt	0.632447	frontal_cortex,Fetal_Renal_Pelvis,H1-hESC
30010_irnt	30030_irnt	0.630764	K562,Fetal_Ovary,frontal_cortex
23120_irnt	23125_irnt	0.63037	frontal_cortex,H1-hESC,Fetal_Renal_Pelvis
23124_irnt	23125_irnt	0.630343	frontal_cortex,Fetal_Renal_Pelvis,H1-hESC
23106_irnt	23121_irnt	0.629765	Fibroblasts,esophagus_muscularis_mucosa,H1-hESC
23101_irnt	23106_irnt	0.629581	esophagus_muscularis_mucosa,Fibroblasts,H1-hESC
23107_irnt	23121_irnt	0.629555	esophagus_muscularis_mucosa,H1-hESC,Fibroblasts
20015_irnt	23129_irnt	0.627662	Fibroblasts,Hematopoietic_multipotent_progenitor_cell,H7-hESC
23107_irnt	23125_irnt	0.627636	esophagus_muscularis_mucosa,H1-hESC,Fibroblasts
23102_irnt	23106_irnt	0.627504	esophagus_muscularis_mucosa,Fibroblasts,H1-hESC
23116_irnt	23125_irnt	0.627346	frontal_cortex,H1-hESC,Fetal_Renal_Pelvis
23100_irnt	23125_irnt	0.627031	frontal_cortex,esophagus_muscularis_mucosa,Fetal_Renal_Pelvis
21002_irnt	23111_irnt	0.626479	frontal_cortex,cerebellum,Fetal_Renal_Pelvis
1727	1747_4	0.626242	Melanocyte,GM12878,esophagus_muscularis_mucosa
50_irnt	23102_irnt	0.626084	H1-hESC,K562,Hematopoietic_multipotent_progenitor_cell
23101_irnt	23108_irnt	0.625243	esophagus_muscularis_mucosa,H1-hESC,Fibroblasts
30010_irnt	30260_irnt	0.625191	K562,frontal_cortex,thoracic_aorta
50_irnt	3062_irnt	0.625085	H7-hESC,Fetal_Lung,upper_lobe_of_left_lung
30000_irnt	30130_irnt	0.624875	Primary_monocytes_from_peripheral_blood,K562,CD4_Primary_Cells
23105_irnt	23108_irnt	0.62364	H1-hESC,esophagus_muscularis_mucosa,Fibroblasts
23102_irnt	23108_irnt	0.623166	esophagus_muscularis_mucosa,H1-hESC,Fibroblasts
49_irnt	23106_irnt	0.622982	esophagus_muscularis_mucosa,H1-hESC,CNCC
1970	1990	0.622693	frontal_cortex,H1-hESC,Primary_B_cells_from_peripheral_blood
23105_irnt	23106_irnt	0.622535	Fibroblasts,esophagus_muscularis_mucosa,H1-hESC
23106_irnt	23117_irnt	0.621589	esophagus_muscularis_mucosa,H1-hESC,frontal_cortex
49_irnt	23107_irnt	0.619854	H1-hESC,esophagus_muscularis_mucosa,CNCC
30250_irnt	30280_irnt	0.618092	K562,Foreskin_Fibroblast_Primary_Cells_skin02,frontal_cortex
49_irnt	23111_irnt	0.617777	Fetal_Renal_Pelvis,frontal_cortex,cerebellum
23105_irnt	23116_irnt	0.617567	frontal_cortex,Fetal_Renal_Pelvis,H1-hESC
23105_irnt	23112_irnt	0.616673	frontal_cortex,Fetal_Renal_Pelvis,Fibroblasts
21002_irnt	23107_irnt	0.616016	H1-hESC,esophagus_muscularis_mucosa,Fibroblasts
49_irnt	23099_irnt	0.614649	Fetal_Renal_Pelvis,frontal_cortex,cerebellum
21001_irnt	23108_irnt	0.614175	H1-hESC,cerebellum,esophagus_muscularis_mucosa
23113_irnt	23116_irnt	0.612835	frontal_cortex,Fetal_Renal_Pelvis,H1-hESC
30130_irnt	30140_irnt	0.612282	Primary_monocytes_from_peripheral_blood,CD4_Primary_Cells,Primary_T_cells_from_cord_blood
5254_irnt	5263_irnt	0.611073	gastroesophageal_sphincter,tibial_nerve,Fibroblasts
21002_irnt	23099_irnt	0.609128	Fetal_Renal_Pelvis,frontal_cortex,cerebellum
3062_irnt	3064_irnt	0.608944	H7-hESC,Foreskin_Fibroblast_Primary_Cells_skin02,Fetal_Lung
20127_irnt	2030	0.607209	heart_left_ventricle,GM12878,Fetal_Spinal_Cord
30130_irnt	30180_irnt	0.606604	CD4_Primary_Cells,Primary_monocytes_from_peripheral_blood,Primary_T_cells_from_cord_blood
6152_8	30150	0.606236	Primary_T_cells_from_cord_blood,GM12878,Primary_Natural_Killer_cells_from_peripheral_blood
30200_irnt	30150	0.605815	Primary_T_cells_from_cord_blood,Primary_Natural_Killer_cells_from_peripheral_blood,CD4_Primary_Cells
23108_irnt	23125_irnt	0.605447	H1-hESC,esophagus_muscularis_mucosa,Fibroblasts
23107_irnt	23120_irnt	0.605079	esophagus_muscularis_mucosa,H1-hESC,cerebellum
30010_irnt	30020_irnt	0.605	K562,Fetal_Ovary,frontal_cortex
21001_irnt	23125_irnt	0.60458	frontal_cortex,H1-hESC,sigmoid_colon
30200_irnt	30210_irnt	0.60429	Primary_T_cells_from_cord_blood,Primary_Natural_Killer_cells_from_peripheral_blood,CD4_Primary_Cells
23108_irnt	23121_irnt	0.603896	H1-hESC,esophagus_muscularis_mucosa,Fibroblasts
20015_irnt	23101_irnt	0.603449	Fibroblasts,H7-hESC,Hematopoietic_multipotent_progenitor_cell
23113_irnt	23128_irnt	0.603134	frontal_cortex,Fetal_Renal_Pelvis,H1-hESC
20015_irnt	23102_irnt	0.602923	Fibroblasts,Hematopoietic_multipotent_progenitor_cell,K562
21001_irnt	23105_irnt	0.602371	frontal_cortex,H1-hESC,Fetal_Renal_Pelvis
49_irnt	23108_irnt	0.602161	H1-hESC,esophagus_muscularis_mucosa,CNCC
23112_irnt	23113_irnt	0.602161	frontal_cortex,Fetal_Renal_Pelvis,H1-hESC
23106_irnt	23129_irnt	0.60203	esophagus_muscularis_mucosa,Fibroblasts,H1-hESC
21001_irnt	23113_irnt	0.602003	frontal_cortex,H1-hESC,Fetal_Renal_Pelvis
6152_9	30210_irnt	0.601451	Primary_T_cells_from_cord_blood,Primary_Natural_Killer_cells_from_peripheral_blood,CD4_Primary_Cells
23106_irnt	23113_irnt	0.601267	esophagus_muscularis_mucosa,H1-hESC,Fibroblasts
30010_irnt	30050_irnt	0.600557	K562,upper_lobe_of_left_lung,Ammons_horn
49_irnt	23127_irnt	0.599611	Fetal_Renal_Pelvis,frontal_cortex,cerebellum
50_irnt	23121_irnt	0.599506	H1-hESC,frontal_cortex,Hematopoietic_multipotent_progenitor_cell
20116_1	20160	0.598717	HepG2,Fetal_Renal_Pelvis,putamen
30120_irnt	30130_irnt	0.598112	CD4_Primary_Cells,K562,Primary_monocytes_from_peripheral_blood
1727	1747_2	0.597928	Jurkat,Gastric,Primary_Natural_Killer_cells_from_peripheral_blood
30140_irnt	30190_irnt	0.59756	Primary_monocytes_from_peripheral_blood,CD4_Primary_Cells,Primary_T_cells_from_cord_blood
30010_irnt	30270_irnt	0.595878	K562,frontal_cortex,upper_lobe_of_left_lung
23106_irnt	23120_irnt	0.595667	esophagus_muscularis_mucosa,Fibroblasts,frontal_cortex
23107_irnt	23124_irnt	0.595273	esophagus_muscularis_mucosa,H1-hESC,Fibroblasts
1697	3062_irnt	0.59459	Psoas_Muscle,frontal_cortex,H7-hESC
30000_irnt	30210_irnt	0.593985	Primary_Natural_Killer_cells_from_peripheral_blood,CD4_Primary_Cells,Fetal_Thymus
23107_irnt	23129_irnt	0.593959	esophagus_muscularis_mucosa,H1-hESC,Fibroblasts
48_irnt	23117_irnt	0.593485	frontal_cortex,Fetal_Renal_Pelvis,H1-hESC
20127_irnt	2000	0.592723	Jurkat,Psoas_Muscle,heart_left_ventricle
23121_irnt	23124_irnt	0.592513	frontal_cortex,H1-hESC,esophagus_muscularis_mucosa
30000_irnt	30190_irnt	0.592329	Primary_monocytes_from_peripheral_blood,CD4_Primary_Cells,Primary_hematopoietic_stem_cells_G-CSF-mobilized_Female
20127_irnt	1950	0.59175	heart_left_ventricle,Fetal_Spinal_Cord,GM12878
23120_irnt	23121_irnt	0.590804	frontal_cortex,H1-hESC,esophagus_muscularis_mucosa
23110_irnt	23125_irnt	0.590725	Fibroblasts,frontal_cortex,tibial_nerve
30000_irnt	30150	0.589779	Primary_Natural_Killer_cells_from_peripheral_blood,CD4_Primary_Cells,Fetal_Thymus
50_irnt	23105_irnt	0.589752	H1-hESC,K562,frontal_cortex
21001_irnt	23110_irnt	0.589332	frontal_cortex,ovary,Fibroblasts
20127_irnt	1940	0.587202	GM12878,Primary_B_cells_from_peripheral_blood,Fetal_Stomach
20015_irnt	23121_irnt	0.586834	Fibroblasts,Psoas_Muscle,Hematopoietic_multipotent_progenitor_cell
23112_irnt	23121_irnt	0.586256	frontal_cortex,Fibroblasts,esophagus_muscularis_mucosa
21002_irnt	23108_irnt	0.585599	H1-hESC,esophagus_muscularis_mucosa,cerebellum
23100_irnt	23121_irnt	0.585309	frontal_cortex,esophagus_muscularis_mucosa,Fibroblasts
5255_irnt	5256_irnt	0.5846	gastroesophageal_sphincter,frontal_cortex,tibial_nerve
23105_irnt	23128_irnt	0.58339	frontal_cortex,H1-hESC,Fetal_Renal_Pelvis
21002_irnt	23127_irnt	0.582996	Fetal_Renal_Pelvis,frontal_cortex,cerebellum
23101_irnt	23120_irnt	0.582602	frontal_cortex,H1-hESC,esophagus_muscularis_mucosa
23102_irnt	23120_irnt	0.580867	frontal_cortex,H1-hESC,esophagus_muscularis_mucosa
30510_irnt	30520_irnt	0.580025	cerebellum,H7-hESC,Jurkat
23108_irnt	23129_irnt	0.580025	esophagus_muscularis_mucosa,H1-hESC,Fibroblasts
23116_irnt	23121_irnt	0.579552	frontal_cortex,H1-hESC,Fibroblasts
23101_irnt	23124_irnt	0.579394	frontal_cortex,H1-hESC,esophagus_muscularis_mucosa
5256_irnt	5263_irnt	0.578895	gastroesophageal_sphincter,tibial_nerve,frontal_cortex
23102_irnt	23124_irnt	0.578816	frontal_cortex,H1-hESC,esophagus_muscularis_mucosa
20015_irnt	23105_irnt	0.57829	Fibroblasts,K562,Psoas_Muscle
48_irnt	23125_irnt	0.577975	frontal_cortex,H1-hESC,esophagus_muscularis_mucosa
23108_irnt	23120_irnt	0.577738	H1-hESC,esophagus_muscularis_mucosa,cerebellum
21002_irnt	23106_irnt	0.577291	frontal_cortex,H1-hESC,Fibroblasts
6152_9	30150	0.577055	Primary_T_cells_from_cord_blood,CD4_Primary_Cells,Primary_Natural_Killer_cells_from_peripheral_blood
1697	3143_irnt	0.576266	frontal_cortex,H1-hESC,Psoas_Muscle
6150_4	4080_irnt	0.575477	CNCC,Fetal_Ovary,adrenal_gland
20015_irnt	23113_irnt	0.573742	K562,Fibroblasts,H7-hESC
4079_irnt	4080_irnt	0.573637	Psoas_Muscle,Fetal_Ovary,gastroesophageal_sphincter
20127_irnt	1980	0.573505	GM12878,heart_left_ventricle,Primary_B_cells_from_peripheral_blood
23106_irnt	23124_irnt	0.573505	frontal_cortex,esophagus_muscularis_mucosa,Fibroblasts
23125_irnt	23128_irnt	0.573374	frontal_cortex,H1-hESC,Fetal_Renal_Pelvis
48_irnt	23105_irnt	0.571928	frontal_cortex,H1-hESC,Fetal_Renal_Pelvis
50_irnt	23113_irnt	0.571902	H1-hESC,K562,frontal_cortex
2000	2030	0.571297	H1-hESC,heart_left_ventricle,Fetal_Spinal_Cord
23100_irnt	23101_irnt	0.571166	frontal_cortex,esophagus_muscularis_mucosa,H1-hESC
49_irnt	23110_irnt	0.570587	frontal_cortex,CNCC,Fetal_Muscle
21001_irnt	23109_irnt	0.570298	frontal_cortex,Fibroblasts,ovary
49_irnt	23109_irnt	0.569063	Fetal_Muscle,frontal_cortex,CNCC
20015_irnt	23117_irnt	0.567695	K562,Fibroblasts,Foreskin_Keratinocyte_Primary_Cells_skin02
48_irnt	23113_irnt	0.56667	frontal_cortex,Fetal_Renal_Pelvis,H1-hESC
23100_irnt	23102_irnt	0.565435	frontal_cortex,esophagus_muscularis_mucosa,H1-hESC
23108_irnt	23124_irnt	0.565145	esophagus_muscularis_mucosa,H1-hESC,cerebellum
50_irnt	23117_irnt	0.56504	H1-hESC,K562,frontal_cortex
20015_irnt	3062_irnt	0.564015	H7-hESC,Foreskin_Fibroblast_Primary_Cells_skin02,Psoas_Muscle
21001_irnt	23121_irnt	0.56341	frontal_cortex,H1-hESC,cerebellum
23110_irnt	23121_irnt	0.56299	Fibroblasts,frontal_cortex,tibial_nerve
30060_irnt	30070_irnt	0.562017	K562,Primary_T_cells_from_cord_blood,Fetal_Spleen
50_irnt	23125_irnt	0.560518	H1-hESC,frontal_cortex,upper_lobe_of_left_lung
1980	1990	0.558389	caudate_nucleus,heart_left_ventricle,GM12878
1717	1747_5	0.558126	Melanocyte,GM12878,esophagus_muscularis_mucosa
23109_irnt	23125_irnt	0.558074	Fibroblasts,frontal_cortex,Psoas_Muscle
23101_irnt	23112_irnt	0.557337	frontal_cortex,esophagus_muscularis_mucosa,Fibroblasts
30180_irnt	30190_irnt	0.557153	CD4_Primary_Cells,Primary_monocytes_from_peripheral_blood,Primary_T_cells_from_cord_blood
30530_irnt	1920	0.556338	BE2C,omental_fat_pad,heart_left_ventricle
23101_irnt	23116_irnt	0.556076	frontal_cortex,H1-hESC,esophagus_muscularis_mucosa
I25	20002_1074	0.55484	Fetal_Ovary,gastroesophageal_sphincter,heart_left_ventricle
23102_irnt	23112_irnt	0.55342	frontal_cortex,esophagus_muscularis_mucosa,Fibroblasts
1717	1747_2	0.553368	Gastric,Primary_Natural_Killer_cells_from_peripheral_blood,HepG2
23113_irnt	3143_irnt	0.553131	H1-hESC,frontal_cortex,Psoas_Muscle
23102_irnt	23116_irnt	0.551554	frontal_cortex,H1-hESC,esophagus_muscularis_mucosa
1727	1747_5	0.550896	Melanocyte,GM12878,esophagus_muscularis_mucosa
47_irnt	23121_irnt	0.549845	frontal_cortex,H1-hESC,Psoas_Muscle
23101_irnt	3143_irnt	0.54924	H1-hESC,frontal_cortex,Psoas_Muscle
30100_irnt	30110_irnt	0.548662	spleen,Primary_hematopoietic_stem_cells_G-CSF-mobilized_Female,Primary_monocytes_from_peripheral_blood
1970	21001_irnt	0.548268	frontal_cortex,H1-hESC,cerebellum
47_irnt	23101_irnt	0.547742	frontal_cortex,H1-hESC,Psoas_Muscle
23117_irnt	3143_irnt	0.54719	H1-hESC,frontal_cortex,esophagus_muscularis_mucosa
1970	1980	0.546795	Primary_B_cells_from_peripheral_blood,GM12878,Ammons_horn
21001_irnt	23101_irnt	0.546585	frontal_cortex,H1-hESC,esophagus_muscularis_mucosa
47_irnt	23129_irnt	0.546217	frontal_cortex,H1-hESC,Psoas_Muscle
47_irnt	1697	0.545455	frontal_cortex,H1-hESC,Psoas_Muscle
30000_irnt	30090_irnt	0.544981	K562,frontal_cortex,CD4_Primary_Cells
47_irnt	23105_irnt	0.543246	frontal_cortex,H1-hESC,Psoas_Muscle
47_irnt	23102_irnt	0.54272	frontal_cortex,H1-hESC,Psoas_Muscle
21001_irnt	23102_irnt	0.542484	frontal_cortex,H1-hESC,esophagus_muscularis_mucosa
30070_irnt	30240_irnt	0.541827	K562,frontal_cortex,upper_lobe_of_left_lung
48_irnt	23121_irnt	0.54138	frontal_cortex,H1-hESC,esophagus_muscularis_mucosa
23129_irnt	3143_irnt	0.540749	H1-hESC,frontal_cortex,Psoas_Muscle
23110_irnt	23129_irnt	0.540433	Fibroblasts,frontal_cortex,Psoas_Muscle
23109_irnt	23121_irnt	0.540354	Fibroblasts,frontal_cortex,Psoas_Muscle
845	1319	0.539829	frontal_cortex,heart_left_ventricle,caudate_nucleus
47_irnt	23125_irnt	0.539092	frontal_cortex,H1-hESC,Psoas_Muscle
23101_irnt	23110_irnt	0.537962	frontal_cortex,Fibroblasts,Psoas_Muscle
23111_irnt	23125_irnt	0.537804	frontal_cortex,esophagus_muscularis_mucosa,Fibroblasts
23102_irnt	23110_irnt	0.537568	frontal_cortex,Fibroblasts,Psoas_Muscle
20002_1065	4080_irnt	0.537463	CNCC,Fetal_Ovary,adrenal_gland
30090_irnt	30130_irnt	0.537173	K562,CD4_Primary_Cells,GM12878
30060_irnt	30270_irnt	0.536832	K562,Primary_T_cells_from_cord_blood,HeLa-S3
23106_irnt	23112_irnt	0.536753	Fibroblasts,frontal_cortex,esophagus_muscularis_mucosa
20015_irnt	23125_irnt	0.534755	Fibroblasts,Psoas_Muscle,Foreskin_Keratinocyte_Primary_Cells_skin02
23106_irnt	23116_irnt	0.534439	Fibroblasts,frontal_cortex,esophagus_muscularis_mucosa
30050_irnt	30060_irnt	0.534097	K562,Primary_T_cells_from_cord_blood,HeLa-S3
23106_irnt	1349	0.533729	Primary_B_cells_from_peripheral_blood,frontal_cortex,Melanocyte
I9_CORATHER	20002_1074	0.533046	Fetal_Ovary,gastroesophageal_sphincter,Primary_monocytes_from_peripheral_blood
23121_irnt	23128_irnt	0.532231	frontal_cortex,H1-hESC,Fibroblasts
30070_irnt	30250_irnt	0.531153	K562,frontal_cortex,upper_lobe_of_left_lung
20002_1065	4079_irnt	0.531074	Fetal_Ovary,CNCC,BE2C
23102_irnt	3143_irnt	0.530023	H1-hESC,frontal_cortex,Psoas_Muscle
3062_irnt	3143_irnt	0.528787	Foreskin_Fibroblast_Primary_Cells_skin02,Psoas_Muscle,gastroesophageal_sphincter
30090_irnt	30200_irnt	0.528524	Psoas_Muscle,CD4_Primary_Cells,Primary_Natural_Killer_cells_from_peripheral_blood
30070_irnt	30270_irnt	0.528445	K562,Primary_T_cells_from_cord_blood,Psoas_Muscle
23101_irnt	23128_irnt	0.528419	frontal_cortex,H1-hESC,esophagus_muscularis_mucosa
I9_IHD	I9_CHD_NOREV	0.527236	Primary_B_cells_from_peripheral_blood,Fetal_Intestine_Large,gastroesophageal_sphincter
I9_IHD	I9_CHD	0.527236	Primary_B_cells_from_peripheral_blood,Fetal_Intestine_Large,gastroesophageal_sphincter
23110_irnt	23120_irnt	0.527078	frontal_cortex,Fibroblasts,sigmoid_colon
23121_irnt	3143_irnt	0.526815	H1-hESC,frontal_cortex,Psoas_Muscle
5254_irnt	5256_irnt	0.526763	gastroesophageal_sphincter,thoracic_aorta,tibial_nerve
23105_irnt	23110_irnt	0.52529	frontal_cortex,Fibroblasts,Psoas_Muscle
23115_irnt	23125_irnt	0.524291	frontal_cortex,H1-hESC,esophagus_muscularis_mucosa
20127_irnt	1930	0.52416	Fetal_Spinal_Cord,Primary_B_cells_from_peripheral_blood,heart_left_ventricle
47_irnt	23113_irnt	0.523398	frontal_cortex,H1-hESC,Psoas_Muscle
6138_3	20116_0	0.521925	HepG2,heart_left_ventricle,cerebellum
30050_irnt	30130_irnt	0.52182	K562,Primary_T_cells_from_cord_blood,spleen
30090_irnt	30180_irnt	0.521663	Psoas_Muscle,CD4_Primary_Cells,Primary_Natural_Killer_cells_from_peripheral_blood
5255_irnt	5264_irnt	0.520874	frontal_cortex,gastroesophageal_sphincter,uterus
30120_irnt	30140_irnt	0.520795	CD4_Primary_Cells,K562,Primary_monocytes_from_peripheral_blood
23107_irnt	23116_irnt	0.52048	Fibroblasts,esophagus_muscularis_mucosa,H1-hESC
2714	23120_irnt	0.520374	caudate_nucleus,cerebellum,H1-hESC
23115_irnt	23117_irnt	0.519849	frontal_cortex,Fetal_Renal_Pelvis,H1-hESC
30060_irnt	30240_irnt	0.519849	K562,HeLa-S3,Jurkat
23100_irnt	23107_irnt	0.519454	esophagus_muscularis_mucosa,Fibroblasts,H1-hESC
23102_irnt	23128_irnt	0.519375	frontal_cortex,H1-hESC,esophagus_muscularis_mucosa
I9_IHD	IX_CIRCULATORY	0.519007	gastroesophageal_sphincter,Fetal_Intestine_Large,Primary_B_cells_from_peripheral_blood
6150_4	4079_irnt	0.519007	Fetal_Ovary,CNCC,Fetal_Spleen
23110_irnt	23112_irnt	0.518587	frontal_cortex,Fibroblasts,tibial_nerve
1717	2267	0.517667	Melanocyte,GM12878,esophagus_muscularis_mucosa
23105_irnt	3143_irnt	0.517377	H1-hESC,frontal_cortex,Psoas_Muscle
23111_irnt	23117_irnt	0.516878	frontal_cortex,Fetal_Renal_Pelvis,esophagus_muscularis_mucosa
30090_irnt	30120_irnt	0.51651	K562,CD4_Primary_Cells,Primary_Natural_Killer_cells_from_peripheral_blood
20002_1226	30110_irnt	0.515826	upper_lobe_of_left_lung,GM12878,Primary_Natural_Killer_cells_from_peripheral_blood
23120_irnt	23129_irnt	0.515222	frontal_cortex,H1-hESC,esophagus_muscularis_mucosa
46_irnt	23125_irnt	0.51467	frontal_cortex,H1-hESC,sigmoid_colon
2714	23123_irnt	0.514617	cerebellum,caudate_nucleus,right_lobe_of_liver
2714	23124_irnt	0.514538	caudate_nucleus,cerebellum,H1-hESC
23110_irnt	23111_irnt	0.51417	Fibroblasts,frontal_cortex,CNCC
23100_irnt	23129_irnt	0.513828	frontal_cortex,esophagus_muscularis_mucosa,Fibroblasts
1697	21002_irnt	0.513671	frontal_cortex,H1-hESC,Psoas_Muscle
23100_irnt	23106_irnt	0.512987	Fibroblasts,esophagus_muscularis_mucosa,frontal_cortex
30040_irnt	30130_irnt	0.512777	K562,Primary_T_cells_from_cord_blood,spleen
47_irnt	23117_irnt	0.512619	frontal_cortex,H1-hESC,thyroid_gland
23124_irnt	23129_irnt	0.512435	frontal_cortex,H1-hESC,esophagus_muscularis_mucosa
30130_irnt	30260_irnt	0.512409	K562,Primary_T_cells_from_cord_blood,spleen
C3_SKIN	1747_5	0.511699	GM12878,HeLa-S3,Melanocyte
23117_irnt	23123_irnt	0.51162	frontal_cortex,Fetal_Renal_Pelvis,H1-hESC
30020_irnt	30070_irnt	0.51162	K562,Primary_T_cells_from_cord_blood,Psoas_Muscle
48_irnt	23102_irnt	0.511567	frontal_cortex,H1-hESC,esophagus_muscularis_mucosa
23106_irnt	23115_irnt	0.51141	esophagus_muscularis_mucosa,Fibroblasts,frontal_cortex
3063_irnt	3143_irnt	0.511383	Foreskin_Fibroblast_Primary_Cells_skin02,Psoas_Muscle,H1-hESC
48_irnt	23101_irnt	0.510831	frontal_cortex,H1-hESC,esophagus_muscularis_mucosa
23110_irnt	23124_irnt	0.510595	frontal_cortex,Fibroblasts,sigmoid_colon
2714	21001_irnt	0.510016	cerebellum,caudate_nucleus,H1-hESC
23110_irnt	1349	0.509859	ovary,frontal_cortex,Primary_B_cells_from_peripheral_blood
23112_irnt	23129_irnt	0.509727	frontal_cortex,esophagus_muscularis_mucosa,Fibroblasts
23107_irnt	23112_irnt	0.509675	Fibroblasts,esophagus_muscularis_mucosa,cerebellum
1920	1930	0.509359	Fetal_Spinal_Cord,Primary_B_cells_from_peripheral_blood,BE2C
30520_irnt	1329	0.508334	frontal_cortex,Primary_T_cells_from_cord_blood,transverse_colon
30120_irnt	30190_irnt	0.506967	CD4_Primary_Cells,Primary_monocytes_from_peripheral_blood,Primary_hematopoietic_stem_cells_G-CSF-mobilized_Female
46_irnt	23121_irnt	0.506888	frontal_cortex,H1-hESC,sigmoid_colon
23106_irnt	23111_irnt	0.506651	Fibroblasts,esophagus_muscularis_mucosa,frontal_cortex
23110_irnt	23116_irnt	0.505573	frontal_cortex,Fibroblasts,tibial_nerve
1960	2040	0.505416	Fetal_Spinal_Cord,Fetal_Spleen,heart_left_ventricle
21001_irnt	1349	0.50531	caudate_nucleus,frontal_cortex,ovary
23116_irnt	23129_irnt	0.505179	frontal_cortex,H1-hESC,Fibroblasts
50_irnt	3063_irnt	0.504417	H7-hESC,Fetal_Lung,H1-hESC
23117_irnt	23119_irnt	0.504101	Fetal_Renal_Pelvis,frontal_cortex,H1-hESC
23109_irnt	23129_irnt	0.503759	Fibroblasts,frontal_cortex,Psoas_Muscle
23105_irnt	23111_irnt	0.503681	frontal_cortex,esophagus_muscularis_mucosa,Fetal_Renal_Pelvis
23102_irnt	23109_irnt	0.50347	Fibroblasts,frontal_cortex,Psoas_Muscle
23101_irnt	23109_irnt	0.503339	Fibroblasts,frontal_cortex,Psoas_Muscle
30080_irnt	30120_irnt	0.503102	K562,Primary_Natural_Killer_cells_from_peripheral_blood,CD4_Primary_Cells
30190_irnt	30150	0.503076	Primary_T_cells_from_cord_blood,CD4_Primary_Cells,Primary_monocytes_from_peripheral_blood
30130_irnt	30270_irnt	0.501788	K562,Primary_T_cells_from_cord_blood,spleen
23105_irnt	23115_irnt	0.501551	frontal_cortex,Fetal_Renal_Pelvis,H1-hESC

## Sheet: Supplementary file 1f
Supplementary file 1f: Number of regions of five genome partition methods (Spec, ARE, SAP, AAP, SEG).
	SpecVar		ARE		SAP		AAP		SEG		SpecVar_SAP		SpecVar_SEG		SAP_SEG
Tissue	Number	Percentage	Number	Percentage	Number	Percentage	Number	Percentage	Number	Percentage	Number	Percentage	Number	Percentage	Number	Percentage
adrenal_gland	1039	0.000158384	21619	0.00445172	11260	0.00119939	371996	0.0525288	2127	0.0678001	264	3.45558e-05	437	6.87093e-05	823	8.03032e-05
Ammons_horn	633	6.22776e-05	21316	0.00340891	9445	0.000819039	272108	0.033558	2127	0.0678001	196	1.6936e-05	211	2.11771e-05	818	6.0833e-05
BE2C	2093	0.00030047	23513	0.00344689	8985	0.00104624	137024	0.0174813	2127	0.0678001	474	6.27051e-05	755	0.000109027	734	6.64451e-05
BJ	345	4.02781e-05	16559	0.0022206	1151	0.000107907	131065	0.0159439	2127	0.0678001	26	2.38496e-06	124	1.43722e-05	113	1.00942e-05
body_of_pancrea	102	9.98992e-06	7969	0.00123036	152	1.06016e-05	29723	0.00409959	2127	0.0678001	4	2.82421e-07	34	3.0671e-06	12	6.7577e-07
breast_epithelium	404	5.55263e-05	15411	0.0029209	691	7.11749e-05	75526	0.0117866	2127	0.0678001	53	7.44048e-06	109	1.44296e-05	82	8.27436e-06
caudate_nucleus	1286	0.000149264	18817	0.00292789	29734	0.00281687	211221	0.0270032	2127	0.0678001	585	5.93572e-05	339	3.99897e-05	1774	0.000147555
CD4_Primary_Cells	514	7.46882e-05	22074	0.00488885	984	0.000100819	106975	0.0184338	2127	0.0678001	116	1.24874e-05	196	2.95627e-05	180	1.62899e-05
CD8_Primary_Cells	722	0.000113021	19759	0.00458938	1366	0.00016478	89929	0.0164641	2127	0.0678001	247	3.44369e-05	316	4.84049e-05	365	3.87439e-05
cerebellum	2315	0.000378586	22365	0.00469821	10544	0.00142401	163654	0.0267079	2127	0.0678001	770	0.000115937	955	0.000164127	2377	0.000251528
CNCC	1212	0.000142138	15686	0.00228799	1873	0.000191392	47877	0.00638255	2127	0.0678001	115	1.18384e-05	167	2.12938e-05	108	8.86279e-06
esophagus_muscularis_mucosa	973	8.32852e-05	20124	0.00276583	14882	0.00118567	261326	0.0272698	2127	0.0678001	221	1.75056e-05	291	2.45107e-05	565	4.27877e-05
esophagus_squamous_epithelium	3713	0.000319358	31291	0.00386711	12718	0.000953983	326167	0.0333205	2127	0.0678001	670	5.06337e-05	982	8.46734e-05	996	6.87424e-05
Fetal_Adrenal_Gland	2582	0.000383482	20660	0.00394338	21233	0.00270541	204194	0.0304529	2127	0.0678001	1257	0.000176465	1207	0.000175287	2694	0.000299511
Fetal_Heart	1247	0.000191477	19327	0.0037533	8617	0.00113939	190014	0.0292786	2127	0.0678001	403	5.64456e-05	532	8.36897e-05	971	0.000117139
Fetal_Intestine_Large	441	6.60106e-05	20616	0.00473145	3131	0.000288756	239054	0.0418074	2127	0.0678001	126	1.11811e-05	221	3.14676e-05	439	3.30289e-05
Fetal_Intestine_Small	980	0.000215161	21815	0.00560204	4225	0.00055241	214065	0.0415355	2127	0.0678001	188	3.62579e-05	434	9.5332e-05	576	7.25774e-05
Fetal_Kidney	479	8.40955e-05	19846	0.00482671	831	7.81082e-05	193716	0.0362449	2127	0.0678001	19	2.48441e-06	154	2.54934e-05	48	4.89136e-06
Fetal_Lung	1923	0.00044999	21539	0.00569485	27241	0.00544227	286218	0.0578214	2127	0.0678001	966	0.000221198	824	0.000189537	1932	0.000352656
Fetal_Muscle	2989	0.000885528	19367	0.00588313	56205	0.0128402	396634	0.0852706	2127	0.0678001	1852	0.000558777	1161	0.000312461	3691	0.000755704
Fetal_Ovary	243	3.23139e-05	13626	0.00264247	861	7.94196e-05	80045	0.0122922	2127	0.0678001	18	1.91033e-06	73	1.05366e-05	74	5.67679e-06
Fetal_Renal_Cortex	625	0.000101729	19667	0.0050129	8719	0.0010379	272159	0.051834	2127	0.0678001	268	3.68696e-05	257	3.64348e-05	584	6.23408e-05
Fetal_Renal_Pelvis	335	4.66508e-05	20960	0.00515393	2376	0.000217806	265053	0.0479031	2127	0.0678001	73	6.53361e-06	134	1.80058e-05	176	1.41924e-05
Fetal_Spinal_Cord	2469	0.000509424	26209	0.00635592	33823	0.00537502	313283	0.0571573	2127	0.0678001	760	0.000144187	725	0.000153855	1679	0.00025253
Fetal_Spleen	433	5.01772e-05	19475	0.00291247	1434	0.000136938	108682	0.0139906	2127	0.0678001	53	5.01217e-06	131	1.53215e-05	132	9.94657e-06
Fetal_Stomach	392	5.20455e-05	24510	0.00505315	3397	0.000318715	329527	0.0504076	2127	0.0678001	72	7.08156e-06	130	1.64088e-05	278	2.35162e-05
Fetal_Thymus	2208	0.000461734	23292	0.00567697	10980	0.00175098	174640	0.0306076	2127	0.0678001	968	0.00019206	894	0.000184032	1498	0.000212874
Fibroblasts	869	0.000123964	16732	0.00277418	16805	0.00183492	244632	0.0329858	2127	0.0678001	380	4.84916e-05	371	5.10254e-05	1344	0.000134584
Foreskin_Fibroblast_Primary_Cells_skin02	681	7.2717e-05	20016	0.00291114	5480	0.000472932	202278	0.0253804	2127	0.0678001	211	1.9897e-05	304	3.21067e-05	685	4.75627e-05
Foreskin_Keratinocyte_Primary_Cells_skin02	1883	0.000292075	18894	0.00306535	10756	0.00133983	140456	0.0197865	2127	0.0678001	563	8.73768e-05	753	0.000115399	864	9.39936e-05
frontal_cortex	1748	0.000261445	23153	0.00466339	24134	0.00275455	257010	0.0381953	2127	0.0678001	760	0.000102294	716	0.000108123	3792	0.000379351
Gastric	528	6.02749e-05	18889	0.00279441	2957	0.000279242	141894	0.0180865	2127	0.0678001	114	1.09548e-05	199	2.17687e-05	251	1.95189e-05
gastrocnemius_medialis	1393	0.000245685	15620	0.0033957	2432	0.000367997	102859	0.0180115	2127	0.0678001	470	8.01811e-05	692	0.000122201	607	8.00934e-05
gastroesophageal_sphincter	181	2.20024e-05	14177	0.00282396	407	3.39938e-05	84271	0.0135745	2127	0.0678001	10	1.23774e-06	61	8.11434e-06	33	3.0789e-06
GM12878	468	4.35333e-05	14728	0.00181393	1827	0.000154338	64425	0.00709141	2127	0.0678001	105	9.1264e-06	150	1.37851e-05	167	1.28317e-05
H1_BMP4_Derived_Trophoblast_Cultured_Cells	1956	0.000278048	23331	0.00372498	10370	0.00117822	193872	0.0259692	2127	0.0678001	448	5.68743e-05	697	9.45479e-05	833	8.21383e-05
H1-hESC	1103	0.000111421	19827	0.00232751	1155	9.64767e-05	108595	0.0116704	2127	0.0678001	94	8.18702e-06	262	2.57586e-05	122	9.25136e-06
H7-hESC	1526	0.000238005	19595	0.00393418	8683	0.000969127	160315	0.0234678	2127	0.0678001	465	6.56801e-05	481	8.14329e-05	1041	0.000106771
heart_left_ventricle	237	2.53927e-05	11702	0.00188654	123	9.35878e-06	50519	0.00718483	2127	0.0678001	11	9.17071e-07	83	8.42386e-06	22	1.31616e-06
HeLa-S3	470	4.83501e-05	17066	0.00218409	1371	0.000114453	85604	0.00973254	2127	0.0678001	70	5.74564e-06	132	1.34478e-05	170	1.10912e-05
Hematopoietic_multipotent_progenitor_cell	375	5.13314e-05	19198	0.0036333	246	2.15762e-05	121929	0.0185782	2127	0.0678001	13	9.89111e-07	112	1.47691e-05	33	2.18191e-06
HepG2	423	4.03604e-05	17817	0.00226942	203	1.57356e-05	63388	0.00712758	2127	0.0678001	31	2.77098e-06	142	1.42103e-05	56	3.39989e-06
Jurkat	332	3.75508e-05	13998	0.00217354	1549	0.000149444	73564	0.00940923	2127	0.0678001	36	3.67721e-06	85	9.91438e-06	121	9.9641e-06
K562	1629	0.000199183	19620	0.00312048	8939	0.000907366	132093	0.016797	2127	0.0678001	615	7.16842e-05	690	8.71798e-05	1748	0.000149524
lower_leg_skin	1894	0.000174671	31149	0.00455668	7818	0.000602009	351355	0.039683	2127	0.0678001	347	2.68794e-05	603	5.55824e-05	653	4.34026e-05
MCF-7	627	6.88693e-05	17678	0.00266049	2080	0.000184299	105446	0.0132946	2127	0.0678001	153	1.57627e-05	192	2.05469e-05	330	2.47673e-05
Melanocyte	3062	0.00039821	23667	0.00321582	15331	0.00172451	140283	0.0171701	2127	0.0678001	1026	0.000126665	970	0.000123577	979	8.88265e-05
omental_fat_pad	1278	0.000118061	24899	0.00379437	11344	0.000892629	351948	0.0391839	2127	0.0678001	265	2.04959e-05	435	4.08325e-05	803	5.98079e-05
ovary	470	5.50504e-05	19846	0.00366022	502	4.06527e-05	104466	0.0155801	2127	0.0678001	33	2.56633e-06	101	1.32056e-05	58	4.14802e-06
Ovary	183	2.07468e-05	15644	0.00297227	780	7.28158e-05	116467	0.0176435	2127	0.0678001	28	2.87202e-06	62	6.92888e-06	94	7.62026e-06
Panc1	530	8.68371e-05	13414	0.00226066	1430	0.000181254	77633	0.0113059	2127	0.0678001	120	1.67087e-05	177	2.98926e-05	229	1.78142e-05
Pancreas	741	9.96579e-05	18524	0.00281805	1511	0.000155473	131183	0.0168573	2127	0.0678001	174	2.2995e-05	332	4.5749e-05	259	2.19609e-05
Peyers_patch	6143	0.00067825	33129	0.00487913	23561	0.00225661	131367	0.0160048	2127	0.0678001	530	5.21054e-05	2125	0.000237737	2180	0.000196963
Primary_B_cells_from_peripheral_blood	577	8.33512e-05	14000	0.00243819	567	6.72599e-05	48092	0.00742187	2127	0.0678001	126	1.56524e-05	263	3.79512e-05	145	1.31001e-05
Primary_hematopoietic_stem_cells_G-CSF-mobilized_Female	1512	0.000227962	20864	0.00439391	17729	0.00203751	188232	0.0302452	2127	0.0678001	731	9.29506e-05	565	8.38165e-05	2200	0.000217225
Primary_monocytes_from_peripheral_blood	1662	0.000172969	17360	0.00210599	2006	0.000171639	73839	0.00827514	2127	0.0678001	365	3.19308e-05	766	7.91869e-05	510	3.6759e-05
Primary_Natural_Killer_cells_from_peripheral_blood	216	2.65951e-05	13942	0.00224169	134	1.05761e-05	44915	0.00642034	2127	0.0678001	17	1.51411e-06	81	9.79261e-06	12	8.60332e-07
Primary_T_cells_from_cord_blood	218	3.18846e-05	16876	0.00328238	78	5.90789e-06	50523	0.0087777	2127	0.0678001	16	1.15455e-06	69	8.91602e-06	8	5.30097e-07
prostate_gland	1405	0.000142329	23660	0.00379251	10156	0.000820425	336984	0.0389989	2127	0.0678001	356	3.06761e-05	464	4.871e-05	929	6.67489e-05
Psoas_Muscle	769	9.56789e-05	19758	0.00361011	3255	0.000320507	167962	0.0241833	2127	0.0678001	259	2.77397e-05	332	4.1425e-05	615	5.13569e-05
putamen	435	6.01247e-05	17062	0.00294462	2602	0.000243525	155005	0.0214455	2127	0.0678001	69	7.31394e-06	108	1.63071e-05	235	1.81126e-05
right_atrium_auricular_region	629	5.69336e-05	17170	0.00259036	3155	0.000236511	188655	0.0211487	2127	0.0678001	80	6.31941e-06	175	1.54143e-05	217	1.53636e-05
right_lobe_of_liver	347	3.39269e-05	10113	0.00143686	547	4.6004e-05	38578	0.00491839	2127	0.0678001	39	3.64246e-06	141	1.34105e-05	89	6.61426e-06
sigmoid_colon	287	4.351e-05	15353	0.00334713	741	7.55664e-05	99417	0.0169116	2127	0.0678001	44	5.10334e-06	120	1.92349e-05	86	9.30013e-06
spleen	5016	0.000525918	35676	0.00509004	85675	0.00763331	612553	0.0712914	2127	0.0678001	2567	0.000240815	1682	0.000181429	7253	0.000597307
stomach	996	0.000112556	26512	0.0046642	5517	0.000459549	324450	0.0406823	2127	0.0678001	159	1.52893e-05	313	3.52975e-05	404	3.1452e-05
subcutaneous_adipose_tissue	151	1.71617e-05	13969	0.00261225	186	1.47936e-05	72496	0.0112274	2127	0.0678001	7	6.30506e-07	21	2.27467e-06	7	5.58785e-07
T47D	1602	0.000197654	24942	0.00424011	8224	0.000789837	175932	0.023114	2127	0.0678001	430	4.69829e-05	560	7.18213e-05	1210	9.3816e-05
testis	5125	0.000525115	34342	0.00445751	20496	0.00172477	429318	0.0490051	2127	0.0678001	1055	9.07212e-05	1442	0.000150215	1585	0.000119447
thoracic_aorta	225	2.2848e-05	10790	0.00151006	294	2.16473e-05	39184	0.00496839	2127	0.0678001	17	1.42135e-06	65	6.27191e-06	20	1.48988e-06
thyroid_gland	4053	0.00082133	32001	0.0074121	18179	0.00267601	380314	0.0558007	2127	0.0678001	1481	0.000291424	1486	0.00030144	2707	0.000371328
tibial_nerve	538	4.89041e-05	16525	0.00256505	2066	0.000152826	114992	0.0132913	2127	0.0678001	61	4.71955e-06	156	1.46339e-05	101	7.02387e-06
transverse_colon	1064	0.000153998	22232	0.00443821	2391	0.000272074	128220	0.0204079	2127	0.0678001	221	2.72361e-05	467	6.64113e-05	346	3.52679e-05
Treg_Primary_Cells	1471	0.000268099	24694	0.00584181	15284	0.00232324	285164	0.0500368	2127	0.0678001	736	0.000132693	577	0.000107359	1837	0.00025839
upper_lobe_of_left_lung	2889	0.000309242	34732	0.00503748	52966	0.00477033	730565	0.0881109	2127	0.0678001	1124	0.000102279	971	0.00010527	4328	0.000350675
uterus	937	0.000115647	24655	0.00461912	2746	0.000256246	167283	0.0244353	2127	0.0678001	166	1.65245e-05	253	2.81691e-05	292	2.50096e-05
vagina	2936	0.000277905	33691	0.00458523	23524	0.00190787	459424	0.0513661	2127	0.0678001	775	6.4013e-05	883	8.41276e-05	1529	0.000113585
Total	94945	0.0135362	199283	0.0426559	694034	0.0850652	1619738	0.313704	6304	0.341846
